# Supplementary material for: Stable and color tunable emission properties based on non-cyclometalated gold(iii) complexes
Source: Royal Society of Chemistry journal article supplement (doi:10.1039/c5dt00405e), 2015-01-01
Supplement: c5dt00405e1.pdf [file c5dt00405e1.pdf]

# Stable and Color Tunable Emission Properties Based on Non-Cyclometalated Gold(III) Complexes

*Michael Bachmann, Olivier Blacque and Koushik Venkatesan\**

Department of Chemistry, University of Zurich, Winterthurerstrasse 190, CH-8057 Zürich, Switzerland

*\*To whom correspondence should be addressed. Email: [venkatesan.koushik@chem.uzh.ch](mailto:venkatesan.koushik@chem.uzh.ch)*

## Table of Contents

|                                                        |     |
|--------------------------------------------------------|-----|
| Crystal structure determinations of <b>1 – 5</b> ..... | S2  |
| UV/Vis profiles of the free pyridine ligands.....      | S23 |
| DFT and TD-DFT calculations.....                       | S24 |

## Crystal structure determination of **1**

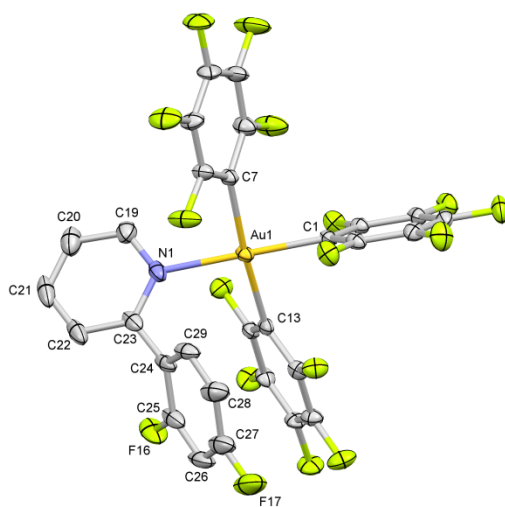

**Figure S1a.** The molecular structure of **1**, with displacement ellipsoids drawn at the 30% probability level. The solvent molecule and all H atoms are omitted.

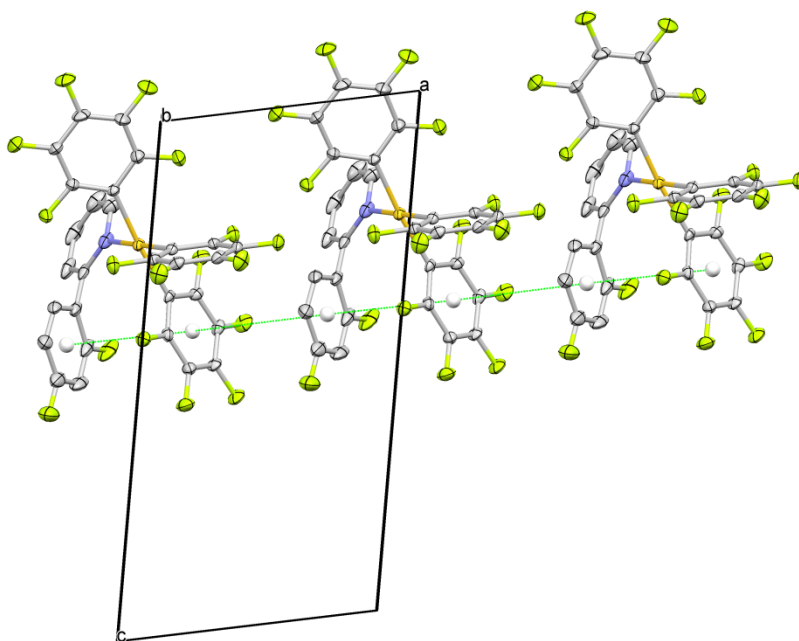

**Figure S1b.** A view along the *b* axis of the crystal packing of **1** showing  $\pi$ ... $\pi$  interactions as green dashed lines.

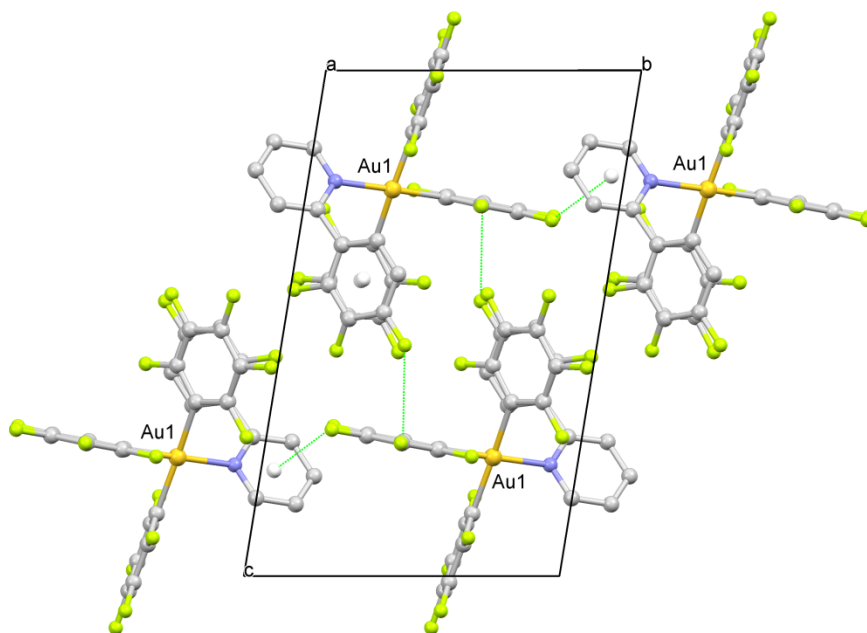

**Figure S1c.** A view along the *a* axis of the crystal packing of **1** showing C—F... $\pi$  interactions as green dashed lines.

**Table S1. Crystal data and structure refinement for 1.**

|                                                              |                                                                                                |
|--------------------------------------------------------------|------------------------------------------------------------------------------------------------|
| CCDC number                                                  | 1024826                                                                                        |
| Empirical formula                                            | C <sub>59</sub> H <sub>16</sub> Au <sub>2</sub> Cl <sub>2</sub> F <sub>34</sub> N <sub>2</sub> |
| Formula weight                                               | 1863.57                                                                                        |
| Temperature/K                                                | 183(1)                                                                                         |
| Crystal system                                               | triclinic                                                                                      |
| Space group                                                  | P-1                                                                                            |
| <i>a</i> /Å                                                  | 8.4911(4)                                                                                      |
| <i>b</i> /Å                                                  | 10.3695(4)                                                                                     |
| <i>c</i> /Å                                                  | 17.1054(11)                                                                                    |
| $\alpha$ /°                                                  | 98.487(4)                                                                                      |
| $\beta$ /°                                                   | 100.945(5)                                                                                     |
| $\gamma$ /°                                                  | 92.939(4)                                                                                      |
| Volume/Å <sup>3</sup>                                        | 1457.63(13)                                                                                    |
| Z                                                            | 1                                                                                              |
| $\rho_{\text{calc}}$ /cm <sup>3</sup>                        | 2.123                                                                                          |
| $\mu$ /mm <sup>-1</sup>                                      | 5.271                                                                                          |
| F(000)                                                       | 882.0                                                                                          |
| Crystal size/mm <sup>3</sup>                                 | 0.33 × 0.26 × 0.13                                                                             |
| Radiation                                                    | MoK $\alpha$ ( $\lambda$ = 0.71073)                                                            |
| 2 $\theta$ range for data collection/°                       | 5.81 to 56.558                                                                                 |
| Index ranges                                                 | -11 ≤ <i>h</i> ≤ 11, -13 ≤ <i>k</i> ≤ 13, -22 ≤ <i>l</i> ≤ 22                                  |
| Reflections collected                                        | 22202                                                                                          |
| Independent reflections                                      | 7227 [ <i>R</i> <sub>int</sub> = 0.0495, <i>R</i> <sub>sigma</sub> = 0.0530]                   |
| Data/restraints/parameters                                   | 7227/39/470                                                                                    |
| Goodness-of-fit on <i>F</i> <sup>2</sup>                     | 1.049                                                                                          |
| Final <i>R</i> indexes [ <i>I</i> > 2 $\sigma$ ( <i>I</i> )] | <i>R</i> <sub>1</sub> = 0.0349, <i>wR</i> <sub>2</sub> = 0.0731                                |
| Final <i>R</i> indexes [all data]                            | <i>R</i> <sub>1</sub> = 0.0448, <i>wR</i> <sub>2</sub> = 0.0775                                |
| Largest diff. peak/hole / e Å <sup>-3</sup>                  | 1.35/-0.88                                                                                     |

**Table S2. Bond Lengths for 1.**

| Atom | Atom | Length/Å | Atom | Atom             | Length/Å  |
|------|------|----------|------|------------------|-----------|
| Au1  | C1   | 2.017(4) | C14  | C15              | 1.378(6)  |
| Au1  | C7   | 2.078(4) | C14  | F11              | 1.346(5)  |
| Au1  | C13  | 2.071(4) | C15  | C16              | 1.374(6)  |
| Au1  | N1   | 2.113(4) | C15  | F12              | 1.335(5)  |
| C1   | C2   | 1.377(6) | C16  | C17              | 1.358(7)  |
| C1   | C6   | 1.360(5) | C16  | F13              | 1.340(5)  |
| C2   | C3   | 1.380(6) | C17  | C18              | 1.388(6)  |
| C2   | F1   | 1.343(5) | C17  | F14              | 1.344(5)  |
| C3   | C4   | 1.366(6) | C18  | F15              | 1.353(5)  |
| C3   | F2   | 1.352(5) | C19  | C20              | 1.369(7)  |
| C4   | C5   | 1.374(6) | C19  | N1               | 1.338(7)  |
| C4   | F3   | 1.332(5) | C20  | C21              | 1.356(9)  |
| C5   | C6   | 1.374(6) | C21  | C22              | 1.393(9)  |
| C5   | F4   | 1.344(5) | C22  | C23              | 1.368(7)  |
| C6   | F5   | 1.351(4) | C23  | C24              | 1.483(8)  |
| C7   | C8   | 1.381(6) | C23  | N1               | 1.358(6)  |
| C7   | C12  | 1.359(6) | C24  | C25              | 1.394(7)  |
| C8   | C9   | 1.384(7) | C24  | C29              | 1.388(8)  |
| C8   | F6   | 1.352(5) | C25  | C26              | 1.367(9)  |
| C9   | C10  | 1.368(7) | C25  | F16              | 1.356(7)  |
| C9   | F7   | 1.340(5) | C26  | C27              | 1.376(10) |
| C10  | C11  | 1.371(7) | C27  | C28              | 1.365(8)  |
| C10  | F8   | 1.340(5) | C27  | F17              | 1.347(8)  |
| C11  | C12  | 1.375(6) | C28  | C29              | 1.374(8)  |
| C11  | F9   | 1.340(5) | C30  | Cl1              | 1.755(9)  |
| C12  | F10  | 1.355(5) | C30  | Cl2A             | 1.753(9)  |
| C13  | C14  | 1.371(6) | C30  | Cl2B             | 1.743(9)  |
| C13  | C18  | 1.391(6) | Cl1  | Cl1 <sup>1</sup> | 1.486(11) |

<sup>1</sup>1-X,-Y,-Z**Table S3. Bond Angles for 1.**

| Atom | Atom | Atom | Angle/°    | Atom | Atom | Atom | Angle/°  |
|------|------|------|------------|------|------|------|----------|
| C1   | Au1  | C7   | 88.89(16)  | C14  | C13  | C18  | 116.3(4) |
| C1   | Au1  | C13  | 87.15(16)  | C18  | C13  | Au1  | 119.2(3) |
| C1   | Au1  | N1   | 177.55(15) | C13  | C14  | C15  | 122.8(4) |
| C7   | Au1  | N1   | 92.59(16)  | F11  | C14  | C13  | 119.2(4) |
| C13  | Au1  | C7   | 174.61(15) | F11  | C14  | C15  | 117.9(4) |
| C13  | Au1  | N1   | 91.24(15)  | C16  | C15  | C14  | 119.1(4) |
| C2   | C1   | Au1  | 120.9(3)   | F12  | C15  | C14  | 120.8(4) |
| C6   | C1   | Au1  | 121.3(3)   | F12  | C15  | C16  | 120.1(4) |
| C6   | C1   | C2   | 117.7(4)   | C17  | C16  | C15  | 120.5(4) |
| C1   | C2   | C3   | 120.7(4)   | F13  | C16  | C15  | 119.4(4) |
| F1   | C2   | C1   | 120.9(4)   | F13  | C16  | C17  | 120.0(4) |
| F1   | C2   | C3   | 118.4(4)   | C16  | C17  | C18  | 119.4(4) |
| C4   | C3   | C2   | 120.5(4)   | F14  | C17  | C16  | 120.9(4) |
| F2   | C3   | C2   | 120.5(4)   | F14  | C17  | C18  | 119.7(4) |
| F2   | C3   | C4   | 119.0(4)   | C17  | C18  | C13  | 121.9(4) |
| C3   | C4   | C5   | 119.2(4)   | F15  | C18  | C13  | 120.1(4) |
| F3   | C4   | C3   | 120.7(4)   | F15  | C18  | C17  | 118.1(4) |
| F3   | C4   | C5   | 120.0(4)   | N1   | C19  | C20  | 122.9(6) |
| C6   | C5   | C4   | 119.4(4)   | C21  | C20  | C19  | 119.3(7) |
| F4   | C5   | C4   | 119.4(4)   | C20  | C21  | C22  | 118.6(6) |
| F4   | C5   | C6   | 121.2(4)   | C23  | C22  | C21  | 120.2(6) |
| C1   | C6   | C5   | 122.4(4)   | C22  | C23  | C24  | 120.8(5) |



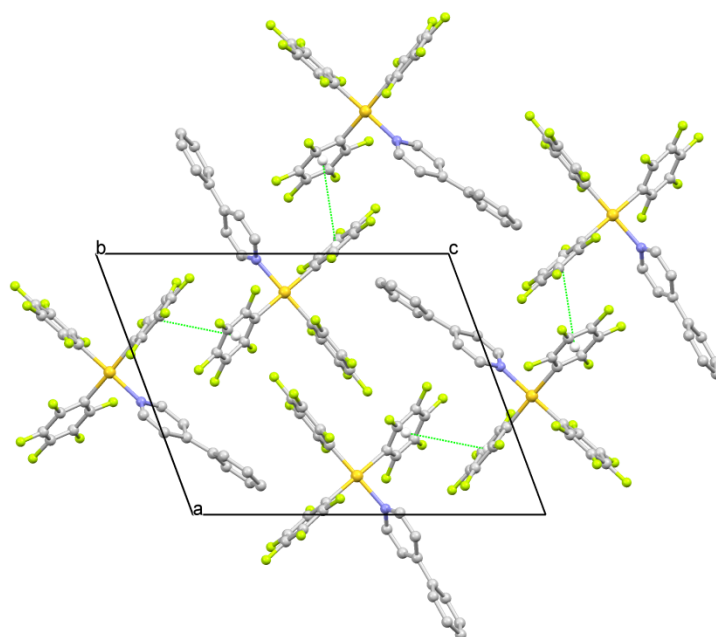

**Figure S2b.** A view along the *b* axis of the crystal packing of **2** showing  $\pi\cdots\pi$  interactions as green dashed lines.

**Table S4. Crystal data and structure refinement for 2.**

|                                                              |                                                                               |
|--------------------------------------------------------------|-------------------------------------------------------------------------------|
| CCDC number                                                  | 1024827                                                                       |
| Empirical formula                                            | $C_{119}H_{43}Au_4F_{60}N_4$                                                  |
| Formula weight                                               | 3456.44                                                                       |
| Temperature/K                                                | 183(1)                                                                        |
| Crystal system                                               | triclinic                                                                     |
| Space group                                                  | P-1                                                                           |
| <i>a</i> /Å                                                  | 13.4052(8)                                                                    |
| <i>b</i> /Å                                                  | 13.8638(6)                                                                    |
| <i>c</i> /Å                                                  | 16.8973(12)                                                                   |
| $\alpha$ /°                                                  | 83.044(4)                                                                     |
| $\beta$ /°                                                   | 68.830(6)                                                                     |
| $\gamma$ /°                                                  | 80.730(4)                                                                     |
| Volume/Å <sup>3</sup>                                        | 2883.4(3)                                                                     |
| <i>Z</i>                                                     | 1                                                                             |
| $\rho_{\text{calc}}$ /cm <sup>3</sup>                        | 1.991                                                                         |
| $\mu$ /mm <sup>-1</sup>                                      | 5.222                                                                         |
| <i>F</i> (000)                                               | 1641.0                                                                        |
| Crystal size/mm <sup>3</sup>                                 | 0.27 × 0.15 × 0.03                                                            |
| Radiation                                                    | MoK $\alpha$ ( $\lambda$ = 0.71073)                                           |
| 2 $\theta$ range for data collection/°                       | 5.562 to 50.7                                                                 |
| Index ranges                                                 | -16 ≤ <i>h</i> ≤ 17, -17 ≤ <i>k</i> ≤ 18, -22 ≤ <i>l</i> ≤ 22                 |
| Reflections collected                                        | 33922                                                                         |
| Independent reflections                                      | 10536 [ <i>R</i> <sub>int</sub> = 0.0665, <i>R</i> <sub>sigma</sub> = 0.0990] |
| Data/restraints/parameters                                   | 10536/400/872                                                                 |
| Goodness-of-fit on <i>F</i> <sup>2</sup>                     | 1.031                                                                         |
| Final <i>R</i> indexes [ <i>I</i> ≥ 2 $\sigma$ ( <i>I</i> )] | <i>R</i> <sub>1</sub> = 0.0552, <i>wR</i> <sub>2</sub> = 0.1197               |
| Final <i>R</i> indexes [all data]                            | <i>R</i> <sub>1</sub> = 0.0800, <i>wR</i> <sub>2</sub> = 0.1326               |
| Largest diff. peak/hole / e Å <sup>-3</sup>                  | 2.27/-1.08                                                                    |

**Table S5. Bond Lengths for 2.**

| Atom | Atom | Length/Å  | Atom | Atom | Length/Å  |
|------|------|-----------|------|------|-----------|
| C1   | C2   | 1.363(13) | C33  | C34  | 1.334(14) |
| C1   | N1   | 1.352(11) | C34  | N2   | 1.335(11) |
| C2   | C3   | 1.386(12) | C35A | C36A | 1.3900    |
| C3   | C4   | 1.399(13) | C35A | C40A | 1.3900    |
| C3   | C6   | 1.478(13) | C36A | C37A | 1.3900    |
| C4   | C5   | 1.356(12) | C37A | C38A | 1.3900    |
| C5   | N1   | 1.336(10) | C38A | C39A | 1.3900    |
| C6   | C7   | 1.381(14) | C39A | C40A | 1.3900    |
| C6   | C11  | 1.387(13) | C35B | C36B | 1.3900    |
| C7   | C8   | 1.378(15) | C35B | C40B | 1.3900    |
| C8   | C9   | 1.363(17) | C36B | C37B | 1.3900    |
| C9   | C10  | 1.375(18) | C37B | C38B | 1.3900    |
| C10  | C11  | 1.396(15) | C38B | C39B | 1.3900    |
| C12  | C13  | 1.386(12) | C39B | C40B | 1.3900    |
| C12  | C17  | 1.394(11) | C41  | C42  | 1.411(12) |
| C12  | Au1  | 1.990(8)  | C41  | C46  | 1.387(12) |
| C13  | C14  | 1.370(13) | C41  | Au2  | 2.050(9)  |
| C13  | F1   | 1.352(10) | C42  | C43  | 1.396(14) |
| C14  | C15  | 1.372(14) | C42  | F16  | 1.353(10) |
| C14  | F2   | 1.320(11) | C43  | C44  | 1.336(13) |
| C15  | C16  | 1.394(15) | C43  | F17  | 1.309(11) |
| C15  | F3   | 1.348(12) | C44  | C45  | 1.369(13) |
| C16  | C17  | 1.383(14) | C44  | F18  | 1.355(11) |
| C16  | F4   | 1.349(11) | C45  | C46  | 1.383(13) |
| C17  | F5   | 1.331(10) | C45  | F19  | 1.334(10) |
| C18  | C19  | 1.380(12) | C46  | F20  | 1.342(10) |
| C18  | C23  | 1.375(12) | C47  | C48  | 1.380(12) |
| C18  | Au1  | 2.065(9)  | C47  | C52  | 1.351(14) |
| C19  | C20  | 1.375(13) | C47  | Au2  | 2.012(9)  |
| C19  | F6   | 1.362(10) | C48  | C49  | 1.380(14) |
| C20  | C21  | 1.367(13) | C48  | F21  | 1.354(11) |
| C20  | F7   | 1.319(10) | C49  | C50  | 1.377(15) |
| C21  | C22  | 1.372(14) | C49  | F22  | 1.352(11) |
| C21  | F8   | 1.339(11) | C50  | C51  | 1.367(15) |
| C22  | C23  | 1.370(14) | C50  | F23  | 1.337(11) |
| C22  | F9   | 1.336(10) | C51  | C52  | 1.369(14) |
| C23  | F10  | 1.369(10) | C51  | F24  | 1.346(12) |
| C24  | C25  | 1.368(13) | C52  | F25  | 1.355(11) |
| C24  | C29  | 1.371(13) | C53  | C54  | 1.368(14) |
| C24  | Au1  | 2.081(10) | C53  | C58  | 1.378(14) |
| C25  | C26  | 1.356(15) | C53  | Au2  | 2.040(9)  |
| C25  | F11  | 1.349(11) | C54  | C55  | 1.382(17) |
| C26  | C27  | 1.368(18) | C54  | F26  | 1.383(14) |
| C26  | F12  | 1.326(13) | C55  | C56  | 1.33(2)   |
| C27  | C28  | 1.40(2)   | C55  | F27  | 1.331(14) |
| C27  | F13  | 1.345(13) | C56  | C57  | 1.349(19) |
| C28  | C29  | 1.364(17) | C56  | F28  | 1.387(13) |
| C28  | F14  | 1.353(14) | C57  | C58  | 1.397(15) |
| C29  | F15  | 1.340(13) | C57  | F29  | 1.326(15) |
| C30  | C31  | 1.365(15) | C58  | F30  | 1.361(12) |
| C30  | N2   | 1.328(12) | N1   | Au1  | 2.068(7)  |
| C31  | C32  | 1.352(15) | N2   | Au2  | 2.069(7)  |
| C32  | C33  | 1.426(16) | C59  | C60  | 1.543(5)  |

|     |      |           |     |                  |          |
|-----|------|-----------|-----|------------------|----------|
| C32 | C35A | 1.477(12) | C60 | C61              | 1.541(5) |
| C32 | C35B | 1.480(13) | C61 | C61 <sup>1</sup> | 1.551(5) |

<sup>1</sup>-X,-Y,2-Z

**Table S6. Bond Angles for 2.**

| Atom | Atom | Atom | Angle/°   | Atom | Atom | Atom | Angle/°   |
|------|------|------|-----------|------|------|------|-----------|
| N1   | C1   | C2   | 122.8(8)  | C40A | C39A | C38A | 120.0     |
| C1   | C2   | C3   | 120.6(9)  | C39A | C40A | C35A | 120.0     |
| C2   | C3   | C4   | 115.7(8)  | C36B | C35B | C32  | 123.9(16) |
| C2   | C3   | C6   | 121.4(8)  | C36B | C35B | C40B | 120.0     |
| C4   | C3   | C6   | 122.9(8)  | C40B | C35B | C32  | 116.0(15) |
| C5   | C4   | C3   | 120.8(8)  | C37B | C36B | C35B | 120.0     |
| N1   | C5   | C4   | 123.0(8)  | C36B | C37B | C38B | 120.0     |
| C7   | C6   | C3   | 121.0(8)  | C39B | C38B | C37B | 120.0     |
| C7   | C6   | C11  | 118.6(9)  | C38B | C39B | C40B | 120.0     |
| C11  | C6   | C3   | 120.4(9)  | C39B | C40B | C35B | 120.0     |
| C8   | C7   | C6   | 120.3(11) | C42  | C41  | Au2  | 121.1(6)  |
| C9   | C8   | C7   | 121.0(12) | C46  | C41  | C42  | 114.0(8)  |
| C8   | C9   | C10  | 120.1(12) | C46  | C41  | Au2  | 124.8(6)  |
| C9   | C10  | C11  | 119.2(11) | C43  | C42  | C41  | 124.0(8)  |
| C6   | C11  | C10  | 120.8(10) | F16  | C42  | C41  | 117.1(8)  |
| C13  | C12  | C17  | 114.6(8)  | F16  | C42  | C43  | 118.8(8)  |
| C13  | C12  | Au1  | 123.8(6)  | C44  | C43  | C42  | 117.4(9)  |
| C17  | C12  | Au1  | 121.6(6)  | F17  | C43  | C42  | 119.7(9)  |
| C14  | C13  | C12  | 125.2(8)  | F17  | C43  | C44  | 122.8(10) |
| F1   | C13  | C12  | 117.2(8)  | C43  | C44  | C45  | 122.8(9)  |
| F1   | C13  | C14  | 117.5(8)  | C43  | C44  | F18  | 118.2(9)  |
| C13  | C14  | C15  | 118.1(9)  | F18  | C44  | C45  | 118.9(9)  |
| F2   | C14  | C13  | 122.0(9)  | C44  | C45  | C46  | 118.7(9)  |
| F2   | C14  | C15  | 119.9(9)  | F19  | C45  | C44  | 120.3(9)  |
| C14  | C15  | C16  | 120.1(10) | F19  | C45  | C46  | 121.0(9)  |
| F3   | C15  | C14  | 120.0(10) | C45  | C46  | C41  | 123.1(9)  |
| F3   | C15  | C16  | 119.9(10) | F20  | C46  | C41  | 119.5(8)  |
| C17  | C16  | C15  | 119.4(9)  | F20  | C46  | C45  | 117.5(8)  |
| F4   | C16  | C15  | 119.3(10) | C48  | C47  | Au2  | 121.1(7)  |
| F4   | C16  | C17  | 121.4(10) | C52  | C47  | C48  | 116.1(9)  |
| C16  | C17  | C12  | 122.5(8)  | C52  | C47  | Au2  | 122.8(7)  |
| F5   | C17  | C12  | 120.5(8)  | C49  | C48  | C47  | 122.1(9)  |
| F5   | C17  | C16  | 116.9(8)  | F21  | C48  | C47  | 120.3(8)  |
| C19  | C18  | Au1  | 125.0(7)  | F21  | C48  | C49  | 117.7(8)  |
| C23  | C18  | C19  | 114.5(9)  | C50  | C49  | C48  | 119.3(9)  |
| C23  | C18  | Au1  | 120.4(7)  | F22  | C49  | C48  | 119.9(10) |
| C20  | C19  | C18  | 123.9(9)  | F22  | C49  | C50  | 120.7(10) |
| F6   | C19  | C18  | 118.8(9)  | C51  | C50  | C49  | 119.6(10) |
| F6   | C19  | C20  | 117.3(8)  | F23  | C50  | C49  | 118.7(10) |
| C21  | C20  | C19  | 118.5(9)  | F23  | C50  | C51  | 121.8(10) |
| F7   | C20  | C19  | 120.7(9)  | C50  | C51  | C52  | 118.9(10) |
| F7   | C20  | C21  | 120.8(9)  | F24  | C51  | C50  | 118.7(10) |
| C20  | C21  | C22  | 120.5(9)  | F24  | C51  | C52  | 122.3(10) |
| F8   | C21  | C20  | 119.8(9)  | C47  | C52  | C51  | 124.1(10) |
| F8   | C21  | C22  | 119.7(9)  | C47  | C52  | F25  | 119.7(9)  |
| C23  | C22  | C21  | 118.5(9)  | F25  | C52  | C51  | 116.3(9)  |
| F9   | C22  | C21  | 120.4(10) | C54  | C53  | C58  | 112.5(10) |



|      |      |      |           |     |     |                  |           |
|------|------|------|-----------|-----|-----|------------------|-----------|
| F9   | C22  | C23  | 121.0(9)  | C54 | C53 | Au2              | 126.8(9)  |
| C22  | C23  | C18  | 124.1(9)  | C58 | C53 | Au2              | 120.6(7)  |
| F10  | C23  | C18  | 118.8(9)  | C53 | C54 | C55              | 124.5(13) |
| F10  | C23  | C22  | 117.1(8)  | C53 | C54 | F26              | 116.2(10) |
| C25  | C24  | C29  | 117.5(10) | C55 | C54 | F26              | 119.3(11) |
| C25  | C24  | Au1  | 119.7(7)  | C56 | C55 | C54              | 118.4(12) |
| C29  | C24  | Au1  | 122.7(8)  | F27 | C55 | C54              | 118.6(15) |
| C26  | C25  | C24  | 124.0(10) | F27 | C55 | C56              | 123.0(14) |
| F11  | C25  | C24  | 119.8(9)  | C55 | C56 | C57              | 122.9(12) |
| F11  | C25  | C26  | 116.3(9)  | C55 | C56 | F28              | 118.4(16) |
| C25  | C26  | C27  | 118.3(11) | C57 | C56 | F28              | 118.6(16) |
| F12  | C26  | C25  | 122.1(12) | C56 | C57 | C58              | 115.7(13) |
| F12  | C26  | C27  | 119.6(12) | F29 | C57 | C56              | 121.6(13) |
| C26  | C27  | C28  | 119.2(11) | F29 | C57 | C58              | 122.8(13) |
| F13  | C27  | C26  | 121.4(15) | C53 | C58 | C57              | 125.9(11) |
| F13  | C27  | C28  | 119.4(15) | F30 | C58 | C53              | 119.8(9)  |
| C29  | C28  | C27  | 120.6(12) | F30 | C58 | C57              | 114.3(10) |
| F14  | C28  | C27  | 118.6(13) | C1  | N1  | Au1              | 120.4(6)  |
| F14  | C28  | C29  | 120.7(15) | C5  | N1  | C1               | 116.9(7)  |
| C28  | C29  | C24  | 120.4(12) | C5  | N1  | Au1              | 121.9(5)  |
| F15  | C29  | C24  | 120.7(10) | C30 | N2  | C34              | 116.2(8)  |
| F15  | C29  | C28  | 118.9(11) | C30 | N2  | Au2              | 122.8(6)  |
| N2   | C30  | C31  | 123.0(10) | C34 | N2  | Au2              | 120.7(6)  |
| C32  | C31  | C30  | 122.1(11) | C12 | Au1 | C18              | 90.7(3)   |
| C31  | C32  | C33  | 114.1(10) | C12 | Au1 | C24              | 89.0(4)   |
| C31  | C32  | C35A | 118.1(11) | C12 | Au1 | N1               | 177.7(3)  |
| C31  | C32  | C35B | 125.8(11) | C18 | Au1 | C24              | 175.0(3)  |
| C33  | C32  | C35A | 127.6(10) | C18 | Au1 | N1               | 88.3(3)   |
| C33  | C32  | C35B | 118.9(10) | N1  | Au1 | C24              | 92.1(3)   |
| C34  | C33  | C32  | 120.7(9)  | C41 | Au2 | N2               | 90.7(3)   |
| C33  | C34  | N2   | 123.8(9)  | C47 | Au2 | C41              | 89.3(4)   |
| C36A | C35A | C32  | 119.5(8)  | C47 | Au2 | C53              | 88.6(4)   |
| C36A | C35A | C40A | 120.0     | C47 | Au2 | N2               | 177.4(3)  |
| C40A | C35A | C32  | 120.4(8)  | C53 | Au2 | C41              | 175.1(3)  |
| C35A | C36A | C37A | 120.0     | C53 | Au2 | N2               | 91.6(3)   |
| C38A | C37A | C36A | 120.0     | C61 | C60 | C59              | 109.9(7)  |
| C37A | C38A | C39A | 120.0     | C60 | C61 | C61 <sup>1</sup> | 108.8(7)  |

<sup>1</sup>X,-Y,2-Z

## Crystal structure determination of **3**.

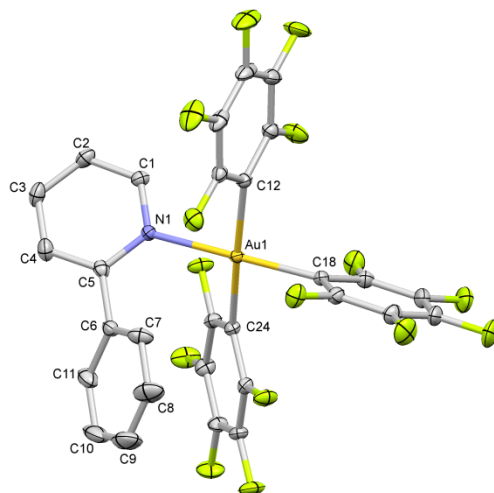

**Figure S3a.** The molecular structure of **3**, with displacement ellipsoids drawn at the 30% probability level. All H atoms are omitted for clarity.

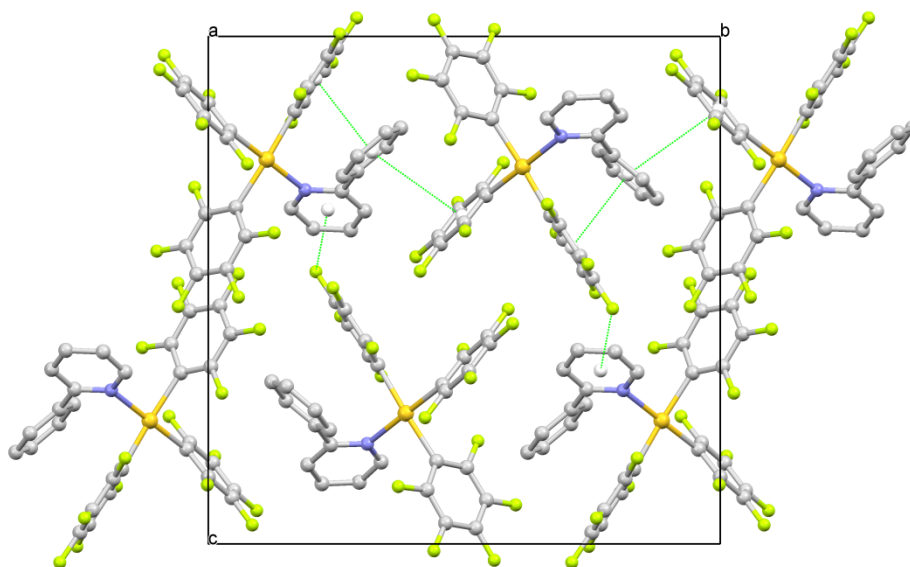

**Figure S3b.** A view along the *a* axis of the crystal packing of **3** showing  $\pi$ ... $\pi$  and C—F... $\pi$  interactions as green dashed lines.

**Table S7.** Crystal data and structure refinement for **3**.

|                   |                                                    |
|-------------------|----------------------------------------------------|
| CCDC number       | 1024828                                            |
| Empirical formula | C <sub>29</sub> H <sub>9</sub> AuF <sub>15</sub> N |
| Formula weight    | 853.34                                             |
| Temperature/K     | 183(1)                                             |
| Crystal system    | monoclinic                                         |
| Space group       | P2 <sub>1</sub> /c                                 |
| <i>a</i> /Å       | 7.9254(4)                                          |
| <i>b</i> /Å       | 18.503(4)                                          |
| <i>c</i> /Å       | 18.4895(11)                                        |

|                                                |                                                                  |
|------------------------------------------------|------------------------------------------------------------------|
| $\alpha/^\circ$                                | 90                                                               |
| $\beta/^\circ$                                 | 97.579(5)                                                        |
| $\gamma/^\circ$                                | 90                                                               |
| Volume/ $\text{\AA}^3$                         | 2687.7(6)                                                        |
| Z                                              | 4                                                                |
| $\rho_{\text{calc}}/\text{g/cm}^3$             | 2.109                                                            |
| $\mu/\text{mm}^{-1}$                           | 5.601                                                            |
| F(000)                                         | 1616.0                                                           |
| Crystal size/ $\text{mm}^3$                    | 0.47 × 0.31 × 0.25                                               |
| Radiation                                      | MoK $\alpha$ ( $\lambda = 0.71073$ )                             |
| 2 $\theta$ range for data collection/ $^\circ$ | 5.634 to 61.014                                                  |
| Index ranges                                   | -11 ≤ h ≤ 11, -26 ≤ k ≤ 26, -26 ≤ l ≤ 26                         |
| Reflections collected                          | 48393                                                            |
| Independent reflections                        | 8205 [ $R_{\text{int}} = 0.0501$ , $R_{\text{sigma}} = 0.0318$ ] |
| Data/restraints/parameters                     | 8205/0/415                                                       |
| Goodness-of-fit on $F^2$                       | 1.036                                                            |
| Final R indexes [ $ I  > 2\sigma(I)$ ]         | $R_1 = 0.0246$ , $wR_2 = 0.0568$                                 |
| Final R indexes [all data]                     | $R_1 = 0.0310$ , $wR_2 = 0.0597$                                 |
| Largest diff. peak/hole / $e \text{\AA}^{-3}$  | 1.85/-0.93                                                       |

**Table S8. Bond Lengths for 3.**

| Atom | Atom | Length/ $\text{\AA}$ | Atom | Atom | Length/ $\text{\AA}$ |
|------|------|----------------------|------|------|----------------------|
| Au1  | C12  | 2.074(2)             | C16  | C17  | 1.372(4)             |
| Au1  | C18  | 2.011(2)             | C16  | F4   | 1.341(4)             |
| Au1  | C24  | 2.054(2)             | C17  | F5   | 1.341(3)             |
| Au1  | N1   | 2.109(2)             | C18  | C19  | 1.369(4)             |
| C1   | C2   | 1.369(4)             | C18  | C23  | 1.375(4)             |
| C1   | N1   | 1.353(3)             | C19  | C20  | 1.389(4)             |
| C2   | C3   | 1.372(4)             | C19  | F6   | 1.341(3)             |
| C3   | C4   | 1.365(4)             | C20  | C21  | 1.362(5)             |
| C4   | C5   | 1.383(4)             | C20  | F7   | 1.346(4)             |
| C5   | C6   | 1.476(4)             | C21  | C22  | 1.366(5)             |
| C5   | N1   | 1.348(3)             | C21  | F8   | 1.344(3)             |
| C6   | C7   | 1.390(4)             | C22  | C23  | 1.380(4)             |
| C6   | C11  | 1.388(4)             | C22  | F9   | 1.332(3)             |
| C7   | C8   | 1.375(4)             | C23  | F10  | 1.343(3)             |
| C8   | C9   | 1.354(6)             | C24  | C25  | 1.379(3)             |
| C9   | C10  | 1.363(7)             | C24  | C29  | 1.380(4)             |
| C10  | C11  | 1.381(5)             | C25  | C26  | 1.381(4)             |
| C12  | C13  | 1.372(4)             | C25  | F11  | 1.342(3)             |
| C12  | C17  | 1.373(4)             | C26  | C27  | 1.367(4)             |
| C13  | C14  | 1.377(4)             | C26  | F12  | 1.343(3)             |
| C13  | F1   | 1.347(4)             | C27  | C28  | 1.378(4)             |
| C14  | C15  | 1.365(5)             | C27  | F13  | 1.337(3)             |
| C14  | F2   | 1.342(4)             | C28  | C29  | 1.382(4)             |
| C15  | C16  | 1.371(5)             | C28  | F14  | 1.336(3)             |
| C15  | F3   | 1.340(3)             | C29  | F15  | 1.352(3)             |

**Table S9. Bond Angles for 3.**

| Atom | Atom | Atom | Angle/ $^\circ$ | Atom | Atom | Atom | Angle/ $^\circ$ |
|------|------|------|-----------------|------|------|------|-----------------|
| C12  | Au1  | N1   | 89.19(9)        | C19  | C18  | Au1  | 123.0(2)        |
| C18  | Au1  | C12  | 90.29(10)       | C19  | C18  | C23  | 116.9(2)        |

|     |     |     |            |     |     |     |            |
|-----|-----|-----|------------|-----|-----|-----|------------|
| C18 | Au1 | C24 | 89.19(10)  | C23 | C18 | Au1 | 120.0(2)   |
| C18 | Au1 | N1  | 179.43(10) | C18 | C19 | C20 | 121.7(3)   |
| C24 | Au1 | C12 | 175.89(10) | F6  | C19 | C18 | 120.8(2)   |
| C24 | Au1 | N1  | 91.35(9)   | F6  | C19 | C20 | 117.5(3)   |
| N1  | C1  | C2  | 122.3(3)   | C21 | C20 | C19 | 119.6(3)   |
| C1  | C2  | C3  | 118.7(3)   | F7  | C20 | C19 | 119.9(3)   |
| C4  | C3  | C2  | 119.1(3)   | F7  | C20 | C21 | 120.6(3)   |
| C3  | C4  | C5  | 121.0(3)   | C20 | C21 | C22 | 120.4(3)   |
| C4  | C5  | C6  | 121.0(3)   | F8  | C21 | C20 | 119.5(3)   |
| N1  | C5  | C4  | 119.6(3)   | F8  | C21 | C22 | 120.1(3)   |
| N1  | C5  | C6  | 119.4(2)   | C21 | C22 | C23 | 118.8(3)   |
| C7  | C6  | C5  | 122.0(3)   | F9  | C22 | C21 | 120.2(3)   |
| C11 | C6  | C5  | 119.4(3)   | F9  | C22 | C23 | 121.0(3)   |
| C11 | C6  | C7  | 118.6(3)   | C18 | C23 | C22 | 122.6(3)   |
| C8  | C7  | C6  | 120.2(3)   | F10 | C23 | C18 | 120.6(2)   |
| C9  | C8  | C7  | 120.6(4)   | F10 | C23 | C22 | 116.8(3)   |
| C8  | C9  | C10 | 120.1(4)   | C25 | C24 | Au1 | 124.46(19) |
| C9  | C10 | C11 | 120.6(4)   | C25 | C24 | C29 | 115.7(2)   |
| C10 | C11 | C6  | 119.8(4)   | C29 | C24 | Au1 | 119.81(17) |
| C13 | C12 | Au1 | 119.5(2)   | C24 | C25 | C26 | 122.5(2)   |
| C13 | C12 | C17 | 115.5(2)   | F11 | C25 | C24 | 120.5(2)   |
| C17 | C12 | Au1 | 124.6(2)   | F11 | C25 | C26 | 117.0(2)   |
| C12 | C13 | C14 | 123.1(3)   | C27 | C26 | C25 | 120.0(2)   |
| F1  | C13 | C12 | 119.4(3)   | F12 | C26 | C25 | 120.4(3)   |
| F1  | C13 | C14 | 117.5(3)   | F12 | C26 | C27 | 119.6(2)   |
| C15 | C14 | C13 | 119.4(3)   | C26 | C27 | C28 | 119.8(2)   |
| F2  | C14 | C13 | 120.5(4)   | F13 | C27 | C26 | 120.7(2)   |
| F2  | C14 | C15 | 120.1(3)   | F13 | C27 | C28 | 119.5(3)   |
| C14 | C15 | C16 | 119.3(3)   | C27 | C28 | C29 | 118.6(3)   |
| F3  | C15 | C14 | 120.6(3)   | F14 | C28 | C27 | 120.2(3)   |
| F3  | C15 | C16 | 120.0(4)   | F14 | C28 | C29 | 121.1(2)   |
| C15 | C16 | C17 | 119.5(3)   | C24 | C29 | C28 | 123.4(2)   |
| F4  | C16 | C15 | 119.8(3)   | F15 | C29 | C24 | 120.0(2)   |
| F4  | C16 | C17 | 120.6(3)   | F15 | C29 | C28 | 116.5(2)   |
| C16 | C17 | C12 | 123.1(3)   | C1  | N1  | Au1 | 115.97(18) |
| F5  | C17 | C12 | 120.3(2)   | C5  | N1  | Au1 | 124.63(17) |
| F5  | C17 | C16 | 116.6(3)   | C5  | N1  | C1  | 119.3(2)   |

## Crystal structure determination of 4.

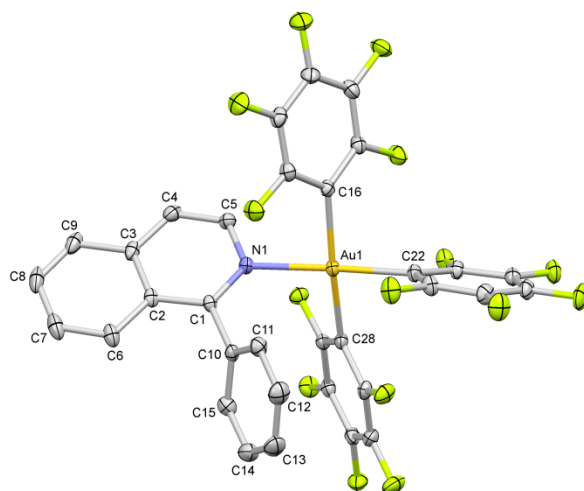

**Figure S4a.** The molecular structure of **4**, with displacement ellipsoids drawn at the 30% probability level. The solvent molecule and all H atoms are omitted for clarity.

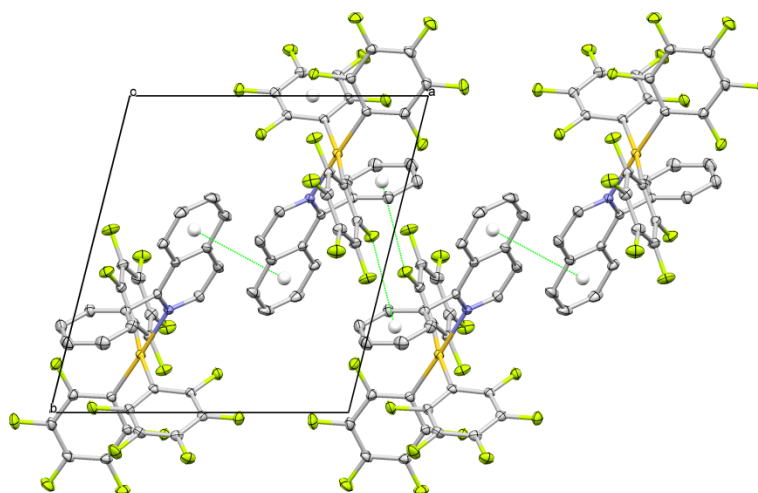

**Figure S4b.** A view along the *b* axis of the crystal packing of **4** showing  $\pi$ ... $\pi$  and C—F... $\pi$  interactions as green dashed lines.

**Table S10.** Crystal data and structure refinement for **4**.

|                   |                                                                                  |
|-------------------|----------------------------------------------------------------------------------|
| CCDC number       | 1024829                                                                          |
| Empirical formula | C <sub>70</sub> H <sub>32</sub> Au <sub>2</sub> F <sub>30</sub> N <sub>2</sub> O |
| Formula weight    | 1880.91                                                                          |
| Temperature/K     | 183(1)                                                                           |
| Crystal system    | triclinic                                                                        |
| Space group       | P-1                                                                              |
| <i>a</i> /Å       | 11.2092(3)                                                                       |
| <i>b</i> /Å       | 12.1878(3)                                                                       |
| <i>c</i> /Å       | 12.5527(3)                                                                       |
| $\alpha$ /°       | 104.977(2)                                                                       |
| $\beta$ /°        | 106.125(2)                                                                       |

|                                                |                                                                  |
|------------------------------------------------|------------------------------------------------------------------|
| $\gamma/^\circ$                                | 98.915(2)                                                        |
| Volume/ $\text{\AA}^3$                         | 1543.23(7)                                                       |
| Z                                              | 1                                                                |
| $\rho_{\text{calc}}/\text{cm}^3$               | 2.024                                                            |
| $\mu/\text{mm}^{-1}$                           | 4.889                                                            |
| F(000)                                         | 902.0                                                            |
| Crystal size/ $\text{mm}^3$                    | 0.47 × 0.19 × 0.15                                               |
| Radiation                                      | MoK $\alpha$ ( $\lambda = 0.71073$ )                             |
| 2 $\theta$ range for data collection/ $^\circ$ | 5.716 to 61.012                                                  |
| Index ranges                                   | -16 ≤ h ≤ 16, -17 ≤ k ≤ 17, -17 ≤ l ≤ 17                         |
| Reflections collected                          | 27853                                                            |
| Independent reflections                        | 9409 [ $R_{\text{int}} = 0.0378$ , $R_{\text{sigma}} = 0.0367$ ] |
| Data/restraints/parameters                     | 9409/0/496                                                       |
| Goodness-of-fit on $F^2$                       | 1.066                                                            |
| Final R indexes [ $ I  > 2\sigma(I)$ ]         | $R_1 = 0.0242$ , $wR_2 = 0.0571$                                 |
| Final R indexes [all data]                     | $R_1 = 0.0270$ , $wR_2 = 0.0587$                                 |
| Largest diff. peak/hole / $e \text{\AA}^{-3}$  | 1.33/-0.93                                                       |

**Table S11. Bond Lengths for 4.**

| Atom | Atom | Length/ $\text{\AA}$ | Atom | Atom | Length/ $\text{\AA}$ |
|------|------|----------------------|------|------|----------------------|
| C1   | C2   | 1.420(3)             | C22  | C23  | 1.383(3)             |
| C1   | C10  | 1.481(3)             | C22  | C27  | 1.379(3)             |
| C1   | N1   | 1.337(3)             | C22  | Au1  | 2.012(2)             |
| C2   | C3   | 1.424(4)             | C23  | C24  | 1.381(4)             |
| C2   | C6   | 1.418(3)             | C23  | F6   | 1.353(3)             |
| C3   | C4   | 1.400(4)             | C24  | C25  | 1.378(4)             |
| C3   | C9   | 1.416(4)             | C24  | F7   | 1.343(3)             |
| C4   | C5   | 1.355(4)             | C25  | C26  | 1.380(4)             |
| C5   | N1   | 1.371(3)             | C25  | F8   | 1.337(3)             |
| C6   | C7   | 1.359(4)             | C26  | C27  | 1.378(3)             |
| C7   | C8   | 1.412(5)             | C26  | F9   | 1.345(3)             |
| C8   | C9   | 1.356(5)             | C27  | F10  | 1.344(3)             |
| C10  | C11  | 1.399(3)             | C28  | C29  | 1.383(3)             |
| C10  | C15  | 1.392(4)             | C28  | C33  | 1.380(3)             |
| C11  | C12  | 1.378(4)             | C28  | Au1  | 2.059(2)             |
| C12  | C13  | 1.388(5)             | C29  | C30  | 1.378(3)             |
| C13  | C14  | 1.391(4)             | C29  | F11  | 1.351(3)             |
| C14  | C15  | 1.380(4)             | C30  | C31  | 1.376(4)             |
| C16  | C17  | 1.381(3)             | C30  | F12  | 1.343(3)             |
| C16  | C21  | 1.395(3)             | C31  | C32  | 1.379(4)             |
| C16  | Au1  | 2.077(2)             | C31  | F13  | 1.341(3)             |
| C17  | C18  | 1.374(4)             | C32  | C33  | 1.379(4)             |
| C17  | F1   | 1.352(3)             | C32  | F14  | 1.338(3)             |
| C18  | C19  | 1.375(4)             | C33  | F15  | 1.355(3)             |
| C18  | F2   | 1.349(3)             | N1   | Au1  | 2.101(2)             |
| C19  | C20  | 1.388(4)             | O1   | C34  | 1.424(10)            |
| C19  | F3   | 1.333(3)             | O1   | C36  | 1.429(12)            |
| C20  | C21  | 1.366(4)             | C34  | C35  | 1.482(12)            |
| C20  | F4   | 1.340(3)             | C36  | C37  | 1.477(12)            |
| C21  | F5   | 1.350(3)             |      |      |                      |

**Table S12. Bond Angles for 4.**

| Atom Atom Atom | Angle/°    | Atom Atom Atom | Angle/°    |
|----------------|------------|----------------|------------|
| C2 C1 C10      | 120.8(2)   | F6 C23 C22     | 119.7(2)   |
| N1 C1 C2       | 120.9(2)   | F6 C23 C24     | 117.5(2)   |
| N1 C1 C10      | 118.3(2)   | C25 C24 C23    | 119.3(2)   |
| C1 C2 C3       | 118.7(2)   | F7 C24 C23     | 121.0(2)   |
| C6 C2 C1       | 122.4(2)   | F7 C24 C25     | 119.7(2)   |
| C6 C2 C3       | 118.9(2)   | C24 C25 C26    | 119.2(2)   |
| C4 C3 C2       | 118.0(2)   | F8 C25 C24     | 120.5(2)   |
| C4 C3 C9       | 122.7(3)   | F8 C25 C26     | 120.3(2)   |
| C9 C3 C2       | 119.3(3)   | C27 C26 C25    | 120.1(2)   |
| C5 C4 C3       | 120.1(2)   | F9 C26 C25     | 119.1(2)   |
| C4 C5 N1       | 122.4(2)   | F9 C26 C27     | 120.8(2)   |
| C7 C6 C2       | 119.9(3)   | C26 C27 C22    | 122.2(2)   |
| C6 C7 C8       | 121.4(3)   | F10 C27 C22    | 120.0(2)   |
| C9 C8 C7       | 120.2(3)   | F10 C27 C26    | 117.8(2)   |
| C8 C9 C3       | 120.4(3)   | C29 C28 Au1    | 118.98(18) |
| C11 C10 C1     | 121.2(2)   | C33 C28 C29    | 115.3(2)   |
| C15 C10 C1     | 119.4(2)   | C33 C28 Au1    | 125.74(18) |
| C15 C10 C11    | 119.4(2)   | C30 C29 C28    | 123.6(2)   |
| C12 C11 C10    | 120.0(3)   | F11 C29 C28    | 120.1(2)   |
| C11 C12 C13    | 120.4(3)   | F11 C29 C30    | 116.4(2)   |
| C12 C13 C14    | 119.8(3)   | C31 C30 C29    | 118.9(2)   |
| C15 C14 C13    | 120.0(3)   | F12 C30 C29    | 121.2(2)   |
| C14 C15 C10    | 120.4(3)   | F12 C30 C31    | 119.9(2)   |
| C17 C16 C21    | 114.3(2)   | C30 C31 C32    | 120.0(2)   |
| C17 C16 Au1    | 120.18(17) | F13 C31 C30    | 119.9(2)   |
| C21 C16 Au1    | 124.68(17) | F13 C31 C32    | 120.2(2)   |
| C18 C17 C16    | 123.6(2)   | C33 C32 C31    | 119.0(2)   |
| F1 C17 C16     | 119.8(2)   | F14 C32 C31    | 119.4(2)   |
| F1 C17 C18     | 116.6(2)   | F14 C32 C33    | 121.5(2)   |
| C17 C18 C19    | 120.1(2)   | C32 C33 C28    | 123.3(2)   |
| F2 C18 C17     | 121.3(2)   | F15 C33 C28    | 120.3(2)   |
| F2 C18 C19     | 118.6(2)   | F15 C33 C32    | 116.4(2)   |
| C18 C19 C20    | 118.6(2)   | C1 N1 C5       | 119.9(2)   |
| F3 C19 C18     | 120.8(2)   | C1 N1 Au1      | 123.45(17) |
| F3 C19 C20     | 120.6(2)   | C5 N1 Au1      | 116.60(15) |
| C21 C20 C19    | 119.4(2)   | C16 Au1 N1     | 89.64(8)   |
| F4 C20 C19     | 118.9(2)   | C22 Au1 C16    | 91.12(9)   |
| F4 C20 C21     | 121.6(2)   | C22 Au1 C28    | 88.55(9)   |
| C20 C21 C16    | 124.0(2)   | C22 Au1 N1     | 176.97(8)  |
| F5 C21 C16     | 119.6(2)   | C28 Au1 C16    | 171.30(9)  |
| F5 C21 C20     | 116.4(2)   | C28 Au1 N1     | 91.15(8)   |
| C23 C22 Au1    | 119.73(17) | C34 O1 C36     | 114.0(5)   |
| C27 C22 C23    | 116.3(2)   | O1 C34 C35     | 110.1(7)   |
| C27 C22 Au1    | 123.72(18) | O1 C36 C37     | 109.9(7)   |
| C24 C23 C22    | 122.8(2)   |                |            |

## Crystal structure determination of 5.

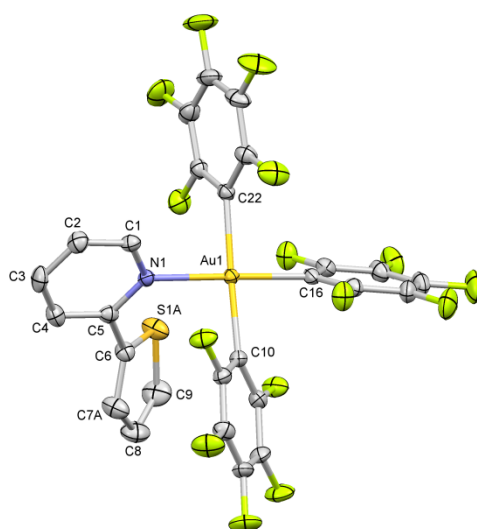

**Figure S5a.** The molecular structure of **5**, with displacement ellipsoids drawn at the 30% probability level. The solvent molecule, all H atoms and the minor component of the disordered thiophene are omitted.

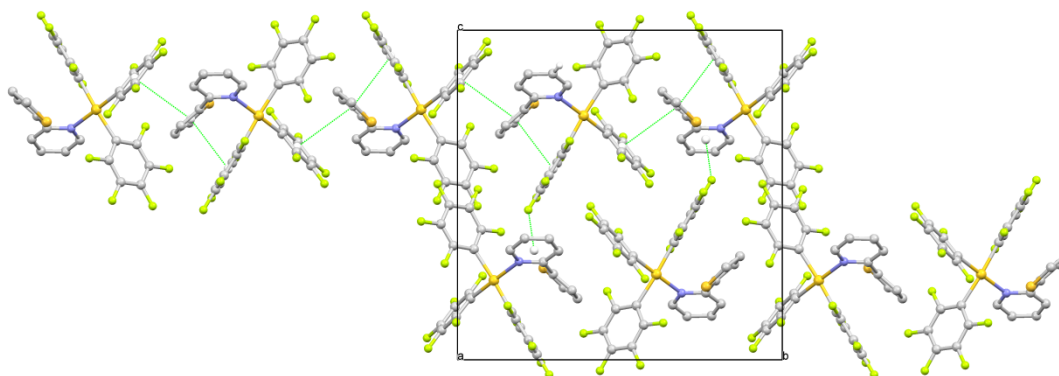

**Figure S5b.** A view along the *a* axis of the crystal packing of **5** showing  $\pi$ ... $\pi$  and C—F... $\pi$  interactions as green dashed lines.

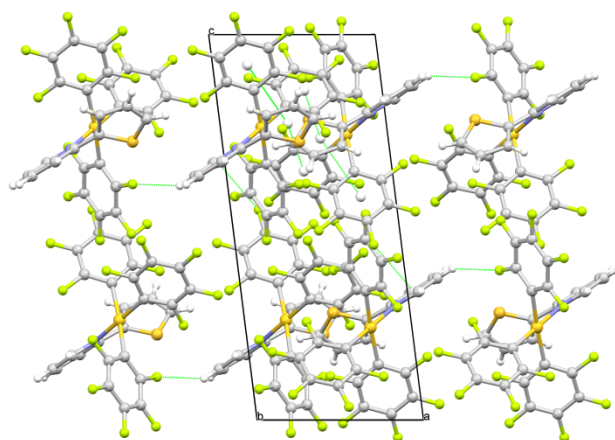

**Figure S5c.** A view along the *b* axis of the crystal packing of **5** showing C—H...F interactions as green dashed lines.



**Table S13. Crystal data and structure refinement for 5.**

|                                             |                                                               |
|---------------------------------------------|---------------------------------------------------------------|
| CCDC number                                 | 1024830                                                       |
| Empirical formula                           | C <sub>27</sub> H <sub>7</sub> AuF <sub>15</sub> NS           |
| Formula weight                              | 859.36                                                        |
| Temperature/K                               | 183(1)                                                        |
| Crystal system                              | monoclinic                                                    |
| Space group                                 | P2 <sub>1</sub> /c                                            |
| a/Å                                         | 7.9119(2)                                                     |
| b/Å                                         | 18.0726(4)                                                    |
| c/Å                                         | 18.4278(4)                                                    |
| α/°                                         | 90                                                            |
| β/°                                         | 97.163(2)                                                     |
| γ/°                                         | 90                                                            |
| Volume/Å <sup>3</sup>                       | 2614.40(11)                                                   |
| Z                                           | 4                                                             |
| ρ <sub>calc</sub> /cm <sup>3</sup>          | 2.183                                                         |
| μ/mm <sup>-1</sup>                          | 5.835                                                         |
| F(000)                                      | 1624.0                                                        |
| Crystal size/mm <sup>3</sup>                | 0.25 × 0.15 × 0.14                                            |
| Radiation                                   | MoKα (λ = 0.71073)                                            |
| 2θ range for data collection/°              | 5.658 to 52.744                                               |
| Index ranges                                | -9 ≤ h ≤ 9, -22 ≤ k ≤ 22, -23 ≤ l ≤ 23                        |
| Reflections collected                       | 36456                                                         |
| Independent reflections                     | 5337 [R <sub>int</sub> = 0.0543, R <sub>sigma</sub> = 0.0285] |
| Data/restraints/parameters                  | 5337/2/407                                                    |
| Goodness-of-fit on F <sup>2</sup>           | 1.039                                                         |
| Final R indexes [I > 2σ (I)]                | R <sub>1</sub> = 0.0218, wR <sub>2</sub> = 0.0536             |
| Final R indexes [all data]                  | R <sub>1</sub> = 0.0241, wR <sub>2</sub> = 0.0549             |
| Largest diff. peak/hole / e Å <sup>-3</sup> | 1.40/-0.68                                                    |

**Table S14. Bond Lengths for 5.**

| Atom | Atom | Length/Å | Atom | Atom | Length/Å |
|------|------|----------|------|------|----------|
| Au1  | C10  | 2.058(3) | C13  | F3   | 1.344(4) |
| Au1  | C16  | 2.016(3) | C14  | C15  | 1.380(4) |
| Au1  | C22  | 2.069(3) | C14  | F4   | 1.341(4) |
| Au1  | N1   | 2.115(2) | C15  | F5   | 1.351(4) |
| C1   | C2   | 1.369(4) | C16  | C17  | 1.372(4) |
| C1   | N1   | 1.343(4) | C16  | C21  | 1.374(4) |
| C2   | C3   | 1.380(5) | C17  | C18  | 1.391(5) |
| C3   | C4   | 1.378(5) | C17  | F6   | 1.341(4) |
| C4   | C5   | 1.381(4) | C18  | C19  | 1.370(5) |
| C5   | C6   | 1.465(4) | C18  | F7   | 1.349(4) |
| C5   | N1   | 1.363(4) | C19  | C20  | 1.372(5) |
| C6   | C7A  | 1.379(7) | C19  | F8   | 1.343(4) |
| C6   | C7B  | 1.381(9) | C20  | C21  | 1.377(4) |
| C6   | S1A  | 1.709(3) | C20  | F9   | 1.342(4) |
| C6   | S1B  | 1.702(4) | C21  | F10  | 1.346(4) |
| C7A  | C8   | 1.423(7) | C22  | C23  | 1.381(4) |
| C7B  | C9   | 1.67(4)  | C22  | C27  | 1.380(4) |
| C8   | C9   | 1.336(5) | C23  | C24  | 1.380(5) |
| C8   | S1B  | 1.520(7) | C23  | F11  | 1.344(4) |
| C9   | S1A  | 1.676(4) | C24  | C25  | 1.372(5) |
| C10  | C11  | 1.377(4) | C24  | F12  | 1.343(4) |
| C10  | C15  | 1.378(4) | C25  | C26  | 1.370(5) |
| C11  | C12  | 1.380(4) | C25  | F13  | 1.346(4) |

|     |     |          |     |     |          |
|-----|-----|----------|-----|-----|----------|
| C11 | F1  | 1.357(4) | C26 | C27 | 1.377(5) |
| C12 | C13 | 1.373(5) | C26 | F14 | 1.345(4) |
| C12 | F2  | 1.342(4) | C27 | F15 | 1.348(4) |
| C13 | C14 | 1.375(5) |     |     |          |

**Table S15. Bond Angles for 5.**

| Atom | Atom | Atom | Angle/°    | Atom | Atom | Atom | Angle/°   |
|------|------|------|------------|------|------|------|-----------|
| C10  | Au1  | C22  | 174.81(12) | F5   | C15  | C14  | 116.7(3)  |
| C10  | Au1  | N1   | 90.28(10)  | C17  | C16  | Au1  | 122.8(2)  |
| C16  | Au1  | C10  | 89.09(12)  | C17  | C16  | C21  | 117.5(3)  |
| C16  | Au1  | C22  | 90.44(12)  | C21  | C16  | Au1  | 119.7(2)  |
| C16  | Au1  | N1   | 178.84(11) | C16  | C17  | C18  | 121.3(3)  |
| C22  | Au1  | N1   | 90.28(11)  | F6   | C17  | C16  | 121.3(3)  |
| N1   | C1   | C2   | 122.7(3)   | F6   | C17  | C18  | 117.4(3)  |
| C1   | C2   | C3   | 118.8(3)   | C19  | C18  | C17  | 119.6(3)  |
| C4   | C3   | C2   | 119.0(3)   | F7   | C18  | C17  | 120.0(3)  |
| C3   | C4   | C5   | 120.5(3)   | F7   | C18  | C19  | 120.3(3)  |
| C4   | C5   | C6   | 120.3(3)   | C18  | C19  | C20  | 120.0(3)  |
| N1   | C5   | C4   | 119.8(3)   | F8   | C19  | C18  | 119.9(3)  |
| N1   | C5   | C6   | 119.9(3)   | F8   | C19  | C20  | 120.1(3)  |
| C5   | C6   | S1A  | 123.2(2)   | C19  | C20  | C21  | 119.2(3)  |
| C5   | C6   | S1B  | 120.5(3)   | F9   | C20  | C19  | 120.0(3)  |
| C7A  | C6   | C5   | 126.9(3)   | F9   | C20  | C21  | 120.8(3)  |
| C7A  | C6   | S1A  | 109.9(3)   | C16  | C21  | C20  | 122.3(3)  |
| C7B  | C6   | C5   | 125.3(16)  | F10  | C21  | C16  | 120.6(3)  |
| C7B  | C6   | S1B  | 113.8(16)  | F10  | C21  | C20  | 117.1(3)  |
| C6   | C7A  | C8   | 113.3(4)   | C23  | C22  | Au1  | 120.4(2)  |
| C6   | C7B  | C9   | 106(2)     | C27  | C22  | Au1  | 124.1(2)  |
| C9   | C8   | C7A  | 110.3(4)   | C27  | C22  | C23  | 115.2(3)  |
| C9   | C8   | S1B  | 124.0(4)   | C24  | C23  | C22  | 123.2(3)  |
| C8   | C9   | C7B  | 102.8(6)   | F11  | C23  | C22  | 119.8(3)  |
| C8   | C9   | S1A  | 114.7(3)   | F11  | C23  | C24  | 117.0(3)  |
| C11  | C10  | Au1  | 120.0(2)   | C25  | C24  | C23  | 119.2(3)  |
| C11  | C10  | C15  | 115.5(3)   | F12  | C24  | C23  | 120.9(3)  |
| C15  | C10  | Au1  | 124.5(2)   | F12  | C24  | C25  | 119.9(3)  |
| C10  | C11  | C12  | 123.4(3)   | C26  | C25  | C24  | 119.9(3)  |
| F1   | C11  | C10  | 119.9(3)   | F13  | C25  | C24  | 120.4(3)  |
| F1   | C11  | C12  | 116.7(3)   | F13  | C25  | C26  | 119.7(3)  |
| C13  | C12  | C11  | 118.9(3)   | C25  | C26  | C27  | 119.2(3)  |
| F2   | C12  | C11  | 121.1(3)   | F14  | C26  | C25  | 120.2(3)  |
| F2   | C12  | C13  | 119.9(3)   | F14  | C26  | C27  | 120.6(3)  |
| C12  | C13  | C14  | 119.9(3)   | C26  | C27  | C22  | 123.4(3)  |
| F3   | C13  | C12  | 119.6(3)   | F15  | C27  | C22  | 119.5(3)  |
| F3   | C13  | C14  | 120.5(3)   | F15  | C27  | C26  | 117.1(3)  |
| C13  | C14  | C15  | 119.3(3)   | C1   | N1   | Au1  | 116.4(2)  |
| F4   | C14  | C13  | 120.0(3)   | C1   | N1   | C5   | 119.2(3)  |
| F4   | C14  | C15  | 120.7(3)   | C5   | N1   | Au1  | 124.2(2)  |
| C10  | C15  | C14  | 123.0(3)   | C9   | S1A  | C6   | 91.85(18) |
| F5   | C15  | C10  | 120.4(3)   | C8   | S1B  | C6   | 93.0(3)   |

## Crystal structure determinations: refinement details

In the crystal structure of **1**, solvent molecules of dichloromethane co-crystallized with the main Au species in a ratio 1:2. The solvent molecule is disordered over two sets of sites around a center of inversion with a site-occupancy factor of 0.5. One Cl atom is further disordered over two other positions with site-occupancy factor of 0.179(7) and 0.321(7). Some restraints/constraints had to be used to correct the geometry of the disordered components and the thermal parameters of the corresponding atoms. All non-H atoms were anisotropically refined. All hydrogen positions were calculated after each cycle of refinement using a riding model, with C—H = 0.93 Å and  $U_{\text{iso}}(\text{H}) = 1.2U_{\text{eq}}(\text{C})$  for aromatic H atoms, and with C—H = 0.97 Å and  $U_{\text{iso}}(\text{H}) = 1.2U_{\text{eq}}(\text{C})$  for the methylene H atoms.

In the crystal structure of **2**, solvent molecules of hexane co-crystallized with the main Au species in a ratio 1:8. The solvent molecule lies on a center of inversion and the non-H atoms were isotropically refined with a site-occupancy factor of 0.5. Some restraints/constraints had to be used to correct the geometry of the disordered components and the thermal parameters of the corresponding atoms. All hydrogen positions were calculated after each cycle of refinement using a riding model, with C—H = 0.93 Å and  $U_{\text{iso}}(\text{H}) = 1.2U_{\text{eq}}(\text{C})$  for aromatic H atoms, with C—H = 0.97 Å and  $U_{\text{iso}}(\text{H}) = 1.2U_{\text{eq}}(\text{C})$  for the methylene H atoms, and with C—H = 0.96 Å and  $U_{\text{iso}}(\text{H}) = 1.5U_{\text{eq}}(\text{C})$  for the methyl H atoms.

In the crystal structure of **3**, all non-H atoms were anisotropically refined and all hydrogen positions were calculated after each cycle of refinement using a riding model with C—H = 0.93 Å and  $U_{\text{iso}}(\text{H}) = 1.2U_{\text{eq}}(\text{C})$ .

In the crystal structure of **4**, solvent molecules of diethyl ether co-crystallized with the main species in a ratio 1:2. The solvent molecule lies around a center of inversion and is disordered over two sets of sites with a site-occupancy factor of 0.5. All non-H atoms were anisotropically refined. All hydrogen positions were calculated after each cycle of refinement using a riding model, with C—H = 0.93 Å and  $U_{\text{iso}}(\text{H}) = 1.2U_{\text{eq}}(\text{C})$  for aromatic H atoms, with C—H = 0.97 Å and  $U_{\text{iso}}(\text{H}) = 1.2U_{\text{eq}}(\text{C})$  for the methylene H atoms, and with C—H = 0.96 Å and  $U_{\text{iso}}(\text{H}) = 1.5U_{\text{eq}}(\text{C})$  for the methyl H atoms.

In the crystal structure of **5**, the thiophene ligand was partially disordered over two different positions (leading to two different orientations) with site-occupancy factors of 0.189(3) and 0.811(3). Some restraints/constraints had to be used to correct the geometry of the disordered components and the thermal parameters of the corresponding atoms. All non-H atoms were anisotropically refined. All hydrogen positions were calculated after each cycle of refinement using a riding model with C—H = 0.93 Å and  $U_{\text{iso}}(\text{H}) = 1.2U_{\text{eq}}(\text{C})$ .

## Shortest intra- and intermolecular interactions in the crystal structures of 1 – 5

**Table S16. Shortest intra- and intermolecular interactions for 1.**

| D   | H    | A               | d(D-H)/Å | d(H-A)/Å | d(D-A)/Å  | D-H-A/° |
|-----|------|-----------------|----------|----------|-----------|---------|
| C22 | H22  | F3 <sup>1</sup> | 0.93     | 2.49     | 3.161(6)  | 129.0   |
| C29 | H29  | F5 <sup>2</sup> | 0.93     | 2.62     | 3.250(6)  | 125.2   |
| C29 | H29  | F10             | 0.93     | 2.27     | 3.180(6)  | 164.3   |
| C30 | H30B | F10             | 0.97     | 2.46     | 3.178(12) | 130.8   |

  

| Y   | X   | Cg               | d(X-Cg)/Å | Y-X-Cg/° |
|-----|-----|------------------|-----------|----------|
| C3  | F2  | Cg1 <sup>3</sup> | 3.242(4)  | 138.5(3) |
| C27 | F17 | Cg2 <sup>4</sup> | 3.244(4)  | 135.0(4) |

  

| Cg  | Cg               | d(Cg-Cg)/Å | alpha/° |
|-----|------------------|------------|---------|
| Cg3 | Cg4              | 4.124(3)   | 12.9(3) |
| Cg3 | Cg4 <sup>2</sup> | 4.369(3)   | 12.9(3) |

<sup>1</sup>-1+X,-1+Y,+Z; <sup>2</sup>-1+X,+Y,+Z; <sup>3</sup>+X,1+Y,+Z; <sup>4</sup>2-X,1-Y,1-Z

Cg1 = centroid of the 6-Membered Ring (1) N(1) --> C(19) --> C(20) --> C(21) --> C(22) --> C(23)

Cg2 = centroid of the 6-Membered Ring (2) C(1) --> C(2) --> C(3) --> C(4) --> C(5) --> C(6)

Cg3 = centroid of the 6-Membered Ring (3) C(13) --> C(14) --> C(15) --> C(16) --> C(17) --> C(18)

Cg4 = centroid of the 6-Membered Ring (4) C(24) --> C(25) --> C(26) --> C(27) --> C(28) --> C(29)

**Table S17. Shortest intra- and intermolecular interactions for 2.**

| D    | H    | A                | d(D-H)/Å | d(H-A)/Å | d(D-A)/Å  | D-H-A/° |
|------|------|------------------|----------|----------|-----------|---------|
| C1   | H1   | F11 <sup>1</sup> | 0.93     | 2.34     | 3.145(10) | 144.3   |
| C8   | H8   | F15 <sup>2</sup> | 0.93     | 2.52     | 3.251(14) | 136.2   |
| C30  | H30  | F30 <sup>3</sup> | 0.93     | 2.37     | 3.249(12) | 157.1   |
| C31  | H31  | F21 <sup>3</sup> | 0.93     | 2.38     | 3.169(12) | 142.9   |
| C33  | H33  | F19 <sup>4</sup> | 0.93     | 2.55     | 3.236(13) | 130.6   |
| C36A | H36A | F22 <sup>3</sup> | 0.93     | 2.52     | 3.197(12) | 130.3   |
| C37A | H37A | F18 <sup>2</sup> | 0.93     | 2.62     | 3.219(11) | 122.4   |
| C38A | H38A | F10              | 0.93     | 2.41     | 3.207(10) | 143.6   |

  

| Y   | X   | Cg               | d(X-Cg)/Å | Y-X-Cg/° |
|-----|-----|------------------|-----------|----------|
| C28 | F14 | Cg1 <sup>5</sup> | 3.114(9)  | 151.0(8) |
| C55 | F27 | Cg4 <sup>6</sup> | 3.224(10) | 147.3(9) |
| C15 | F3  | Cg6 <sup>5</sup> | 3.314(9)  | 147.4(7) |

  

| Cg  | Cg               | d(Cg-Cg)/Å | alpha/° |
|-----|------------------|------------|---------|
| Cg6 | Cg2 <sup>5</sup> | 4.223(7)   | 26.5(6) |
| Cg5 | Cg3 <sup>6</sup> | 4.329(7)   | 29.7(6) |

<sup>1</sup>-X,1-Y,1-Z; <sup>2</sup>-1+X,+Y,+Z; <sup>3</sup>1-X,-Y,2-Z; <sup>4</sup>1-X,1-Y,2-Z; <sup>5</sup>1-X,1-Y,1-Z; <sup>6</sup>-X,1-Y,2-Z.

Cg1 = centroid of the 6-membered ring (1) N(2) --> C(30) --> C(31) --> C(32) --> C(33) --> C(34)

Cg2 = centroid of the 6-membered ring (2) C(41) --> C(42) --> C(43) --> C(44) --> C(45) --> C(46)

Cg3 = centroid of the 6-membered ring (3) C(53) --> C(54) --> C(55) --> C(56) --> C(57) --> C(58)

Cg4 = centroid of the 6-membered ring (4) N(1) --> C(1) --> C(2) --> C(3) --> C(4) --> C(5)

Cg5 = centroid of the 6-membered ring (5) C(18) --> C(19) --> C(20) --> C(21) --> C(22) --> C(23)

Cg6 = centroid of the 6-membered ring (6) C(24) --> C(25) --> C(26) --> C(27) --> C(28) --> C(29)

**Table S18. Shortest intra- and intermolecular interactions for 3.**

| D   | H                | A                | d(D-H)/Å  | d(H-A)/Å   | d(D-A)/Å | D-H-A/° |
|-----|------------------|------------------|-----------|------------|----------|---------|
| C2  | H2               | F5 <sup>1</sup>  | 0.93      | 2.46       | 3.265(3) | 144.3   |
| C2  | H2               | F12 <sup>2</sup> | 0.93      | 2.57       | 3.240(3) | 129.7   |
| C7  | H7               | F5               | 0.93      | 2.31       | 3.241(4) | 176.7   |
| Y   | X                | Cg               | d(X-Cg)/Å | Y-X-Cg/°   |          |         |
| C27 | F13              | Cg1 <sup>3</sup> | 2.992(2)  | 131.98(17) |          |         |
| C21 | F8               | Cg4 <sup>4</sup> | 3.479(3)  | 145.83(19) |          |         |
| Cg  | Cg               | d(Cg-Cg)/Å       | alpha/°   |            |          |         |
| Cg2 | Cg4              | 3.888(2)         | 17.12(16) |            |          |         |
| Cg2 | Cg3 <sup>5</sup> | 4.108(2)         | 20.32(16) |            |          |         |

<sup>1</sup>1+X,+Y,+Z; <sup>2</sup>1+X,1/2-Y,1/2+Z; <sup>3</sup>X,1/2-Y,-1/2+Z; <sup>4</sup>-X,-Y,-Z; <sup>5</sup>-X,1/2+Y,1/2-Z

Cg1 = centroid of the 6-membered ring (1) N(1) --> C(1) --> C(2) --> C(3) --> C(4) --> C(5)  
 Cg2 = centroid of the 6-membered ring (2) C(6) --> C(7) --> C(8) --> C(9) --> C(10) --> C(11)  
 Cg3 = centroid of the 6-membered ring (3) C(18) --> C(19) --> C(20) --> C(21) --> C(22) --> C(23)  
 Cg4 = centroid of the 6-membered ring (4) C(24) --> C(25) --> C(26) --> C(27) --> C(28) --> C(29)

**Table S19. Shortest intra- and intermolecular interactions for 4.**

| D   | H                | A                | d(D-H)/Å  | d(H-A)/Å   | d(D-A)/Å | D-H-A/° |
|-----|------------------|------------------|-----------|------------|----------|---------|
| C9  | H9               | F13 <sup>1</sup> | 0.93      | 2.50       | 3.192(4) | 131.2   |
| C11 | H11              | F5               | 0.93      | 2.40       | 3.251(3) | 152.2   |
| C12 | H12              | F14 <sup>2</sup> | 0.93      | 2.55       | 3.218(4) | 129.6   |
| Y   | X                | Cg               | d(X-Cg)/Å | Y-X-Cg/°   |          |         |
| C21 | F5               | Cg3 <sup>3</sup> | 3.482(2)  | 133.63(14) |          |         |
| C25 | F8               | Cg4              | 3.407(2)  | 150.83(18) |          |         |
| Cg  | Cg               | d(Cg-Cg)/Å       | alpha/°   |            |          |         |
| Cg1 | Cg1 <sup>4</sup> | 3.7820(18)       | 0         |            |          |         |
| Cg3 | Cg2              | 4.0573(16)       | 14.61(13) |            |          |         |

<sup>1</sup>+X,1+Y,+Z; <sup>2</sup>2-X,-Y,1-Z; <sup>3</sup>2-X,1-Y,1-Z; <sup>4</sup>1-X,1-Y,1-Z

Cg1 = centroid of the 6-membered ring (1) C(2) --> C(3) --> C(9) --> C(8) --> C(7) --> C(6)  
 Cg2 = centroid of the 6-membered ring (2) C(28) --> C(29) --> C(30) --> C(31) --> C(32) --> C(33)  
 Cg3 = centroid of the 6-membered ring (3) C(10) --> C(11) --> C(12) --> C(13) --> C(14) --> C(15)  
 Cg4 = centroid of the 6-membered ring (4) C(16) --> C(17) --> C(18) --> C(19) --> C(20) --> C(21)

**Table S20. Shortest intra- and intermolecular interactions for 5.**

| D   | H                | A                | d(D-H)/Å  | d(H-A)/Å | d(D-A)/Å | D-H-A/° |
|-----|------------------|------------------|-----------|----------|----------|---------|
| C2  | H2               | F4 <sup>1</sup>  | 0.93      | 2.60     | 3.279(4) | 130.1   |
| C2  | H2               | F15 <sup>2</sup> | 0.93      | 2.43     | 3.263(4) | 149.2   |
| C7B | H7B              | F15              | 0.93      | 2.46     | 3.32(3)  | 154.2   |
| Y   | X                | Cg               | d(X-Cg)/Å | Y-X-Cg/° |          |         |
| C13 | F3               | Cg3 <sup>3</sup> | 2.983(3)  | 136.1(2) |          |         |
| Cg  | Cg               | d(Cg-Cg)/Å       | alpha/°   |          |          |         |
| Cg2 | Cg5 <sup>4</sup> | 3.916(7)         | 12.1(7)   |          |          |         |
| Cg2 | Cg4              | 3.930(7)         | 13.7(7)   |          |          |         |

Cg1 Cg5<sup>4</sup> 3.932(2) 15.21(19)  
Cg1 Cg4 3.966(2) 17.35(19)

---

<sup>1</sup>1+X,1/2-Y,1/2+Z; <sup>2</sup>1+X,+Y,+Z; <sup>3</sup>X,1/2-Y,-1/2+Z; <sup>4</sup>1-X,-1/2+Y,3/2-Z

Cg1 = centroid of the 5-membered ring (1) S(1A) --> C(6) --> C(7A) --> C(8) --> C(9)

Cg2 = centroid of the 5-membered ring (2) C(6) --> S(1B) --> C(8) --> C(9) --> C(7B)

Cg3 = centroid of the 6-membered ring (3) N(1) --> C(1) --> C(2) --> C(3) --> C(4) --> C(5)

Cg4 = centroid of the 6-membered ring (4) C(10) --> C(11) --> C(12) --> C(13) --> C(14) --> C(15)

Cg5 = centroid of the 6-membered ring (5) C(16) --> C(17) --> C(18) --> C(19) --> C(20) --> C(21)

### UV/Vis profiles of the free pyridine ligands

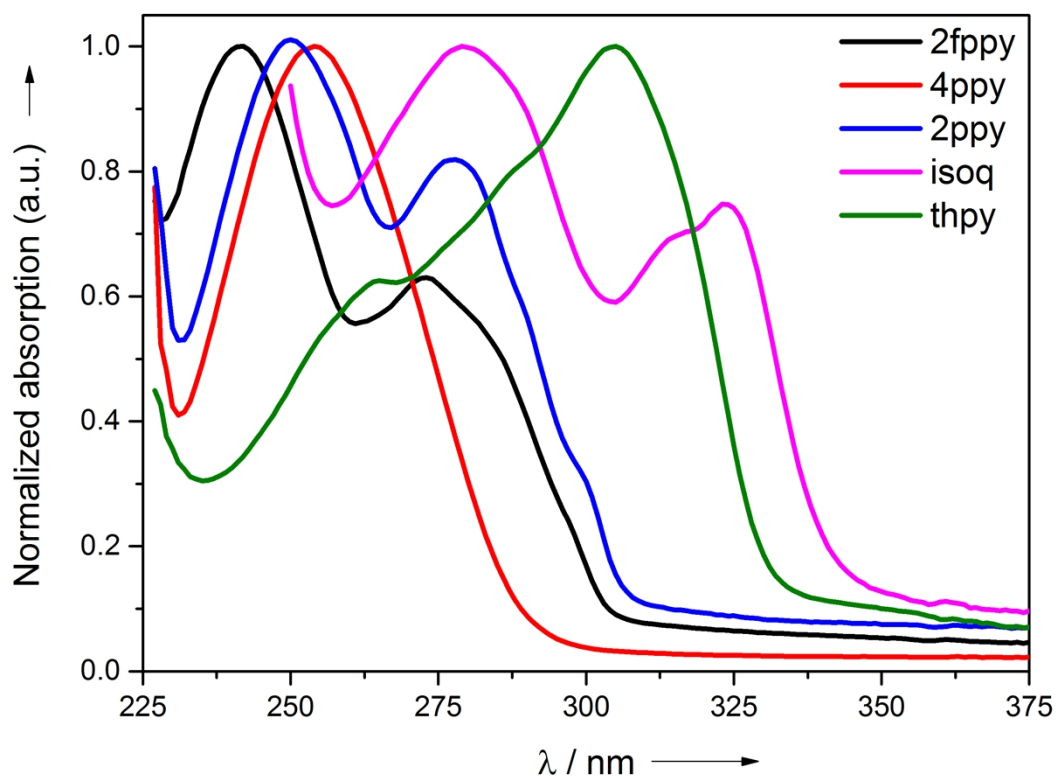

**Figure S6.** UV/Vis absorption spectra of the free pyridine ligands in  $\text{CH}_2\text{Cl}_2$ .

## DFT calculations

### Energies and cartesian coordinates of the DFT optimized ground-state structure of 1

|    |             |             |             |
|----|-------------|-------------|-------------|
| C  | 0.20236900  | -2.72537200 | -1.86448600 |
| H  | 1.04391900  | -2.17961000 | -2.27730300 |
| C  | -0.22681900 | -3.91276400 | -2.43060000 |
| H  | 0.28968200  | -4.31125000 | -3.29739300 |
| C  | -1.32323600 | -4.55675900 | -1.86530600 |
| H  | -1.69247000 | -5.49201100 | -2.27662700 |
| C  | -1.93432100 | -3.98990800 | -0.75736500 |
| H  | -2.77851100 | -4.47355500 | -0.27829400 |
| C  | -1.45787600 | -2.78642000 | -0.22826400 |
| C  | -2.08910900 | -2.20573200 | 0.97380700  |
| C  | -3.47297900 | -2.02182200 | 1.04443800  |
| C  | -4.10934100 | -1.51531200 | 2.16404000  |
| H  | -5.18315900 | -1.36442000 | 2.17759500  |
| C  | -3.31778500 | -1.19708800 | 3.25884600  |
| C  | -1.94079400 | -1.36458000 | 3.25586800  |
| H  | -1.35738400 | -1.10226500 | 4.13183800  |
| C  | -1.33979600 | -1.86577100 | 2.10816100  |
| H  | -0.26561700 | -2.01577300 | 2.09791200  |
| C  | 2.24681700  | -0.90447800 | -0.05548800 |
| C  | 3.17289000  | -0.70989900 | -1.07288800 |
| C  | 4.49698800  | -1.12500500 | -0.98822700 |
| C  | 4.93198900  | -1.76367300 | 0.16686600  |
| C  | 4.03811000  | -1.97984100 | 1.20848700  |
| C  | 2.72229900  | -1.54890700 | 1.07746600  |
| C  | -1.57297500 | 0.59701000  | -0.64628000 |
| C  | -2.28836200 | 1.31997900  | 0.29838800  |
| C  | -3.54497000 | 1.85612600  | 0.03874500  |
| C  | -4.11567900 | 1.67943900  | -1.21628700 |
| C  | -3.42516000 | 0.97100100  | -2.19196700 |
| C  | -2.17259300 | 0.44933100  | -1.88991200 |
| C  | 0.98158800  | 1.64935300  | 0.06179500  |
| C  | 1.37766900  | 2.03574800  | 1.33502700  |
| C  | 1.84646900  | 3.31652700  | 1.60288500  |
| C  | 1.92758000  | 4.24384500  | 0.57070200  |
| C  | 1.53887600  | 3.88277100  | -0.71353600 |
| C  | 1.07059800  | 2.59470200  | -0.95138100 |
| N  | -0.39860700 | -2.16837800 | -0.79735500 |
| F  | 2.79364500  | -0.10441600 | -2.21398500 |
| F  | 5.34664300  | -0.92248800 | -1.99488400 |
| F  | 6.19312900  | -2.17241300 | 0.27172900  |
| F  | 4.44838800  | -2.59973300 | 2.31481800  |
| F  | 1.90426200  | -1.79593000 | 2.11747200  |
| F  | -1.78274900 | 1.51858800  | 1.52559600  |
| F  | -4.20930800 | 2.53108400  | 0.97785400  |
| F  | -5.31850300 | 2.18317100  | -1.48057100 |
| F  | -3.96807600 | 0.79984900  | -3.39760500 |
| F  | -1.53898900 | -0.22599700 | -2.86679400 |
| F  | 1.31418200  | 1.16858200  | 2.35295900  |
| F  | 2.21752800  | 3.66062000  | 2.83512700  |
| F  | 2.37575400  | 5.47252600  | 0.81134700  |
| F  | 1.61489900  | 4.77054300  | -1.70342200 |
| F  | 0.69975900  | 2.28818900  | -2.19942800 |
| Au | 0.30248600  | -0.20581400 | -0.29829300 |
| F  | -4.23059200 | -2.32036500 | -0.02577100 |
| F  | -3.91522300 | -0.71382900 | 4.35419100  |

|                                              |                             |
|----------------------------------------------|-----------------------------|
| Zero-point correction=                       | 0.307842 (Hartree/Particle) |
| Thermal correction to Energy=                | 0.350257                    |
| Thermal correction to Enthalpy=              | 0.351201                    |
| Thermal correction to Gibbs Free Energy=     | 0.228040                    |
| Sum of electronic and zero-point Energies=   | -2993.832902                |
| Sum of electronic and thermal Energies=      | -2993.790487                |
| Sum of electronic and thermal Enthalpies=    | -2993.789543                |
| Sum of electronic and thermal Free Energies= | -2993.912705                |

### Energies and cartesian coordinates of the DFT optimized ground-state structure of 2

|   |             |             |            |
|---|-------------|-------------|------------|
| C | -0.41262300 | -2.06723000 | 0.05062300 |
| C | -0.87697000 | -2.79337000 | 1.13781200 |
| C | -0.87231500 | -4.18422900 | 1.16854900 |



|    |             |             |             |
|----|-------------|-------------|-------------|
| C  | -0.38820600 | -4.88542200 | 0.07044200  |
| C  | 0.08769300  | -4.19200600 | -1.03684400 |
| C  | 0.06674800  | -2.80245900 | -1.02448900 |
| C  | -0.41265700 | 2.06723900  | -0.05061200 |
| C  | -0.87701500 | 2.79339500  | -1.13778500 |
| C  | -0.87237600 | 4.18425600  | -1.16849000 |
| C  | -0.38827300 | 4.88543300  | -0.07037200 |
| C  | 0.08763800  | 4.19200000  | 1.03690000  |
| C  | 0.06670800  | 2.80245300  | 1.02451400  |
| C  | -2.41342100 | -0.00001600 | -0.00002100 |
| C  | -3.13431700 | -0.45138000 | -1.09754500 |
| C  | -4.52470100 | -0.45595300 | -1.11253500 |
| C  | -5.22175800 | -0.00004700 | -0.00004400 |
| C  | -4.52473000 | 0.45587800  | 1.11245800  |
| C  | -3.13434500 | 0.45133600  | 1.09749100  |
| F  | -1.34510300 | -2.15555200 | 2.22370700  |
| F  | -1.32032000 | -4.84952500 | 2.23360100  |
| F  | -0.37304000 | -6.21603400 | 0.08148300  |
| F  | 0.55985600  | -4.86463000 | -2.08698700 |
| F  | 0.54579000  | -2.16819700 | -2.11012100 |
| F  | -1.34514300 | 2.15559700  | -2.22369300 |
| F  | -1.32039100 | 4.84956800  | -2.23352800 |
| F  | -0.37312200 | 6.21604500  | -0.08138600 |
| F  | 0.55979500  | 4.86460800  | 2.08705400  |
| F  | 0.54575800  | 2.16817200  | 2.11013200  |
| F  | -2.49775300 | -0.90063600 | -2.18569900 |
| F  | -5.19148100 | -0.89370500 | -2.17957700 |
| F  | -6.55199300 | -0.00006400 | -0.00005500 |
| F  | -5.19153700 | 0.89361500  | 2.17948800  |
| F  | -2.49780900 | 0.90060900  | 2.18565200  |
| Au | -0.40538100 | 0.00000400  | 0.00000400  |
| C  | 2.39159300  | 0.46809300  | -1.05675200 |
| C  | 2.39160700  | -0.46805800 | 1.05676200  |
| C  | 3.77469900  | 0.47761800  | -1.09402100 |
| C  | 3.77471400  | -0.47758900 | 1.09400900  |
| H  | 1.79993600  | -0.83104900 | 1.89093000  |
| C  | 4.50957200  | 0.00001500  | -0.00001000 |
| H  | 4.27451500  | -0.83500200 | 1.98865300  |
| N  | 1.70978300  | 0.00001900  | 0.00001000  |
| H  | 1.79991200  | 0.83109000  | -1.89091100 |
| H  | 4.27448900  | 0.83502700  | -1.98866800 |
| C  | 5.98421200  | 0.00001600  | -0.00002200 |
| C  | 6.69681800  | -1.04552800 | 0.60359000  |
| C  | 6.69680400  | 1.04556500  | -0.60364400 |
| C  | 8.08795300  | -1.04718500 | 0.59870300  |
| H  | 6.16024000  | -1.87874400 | 1.05071600  |
| C  | 8.08793900  | 1.04723200  | -0.59877300 |
| H  | 6.16021400  | 1.87877500  | -1.05076600 |
| C  | 8.78697400  | 0.00002600  | -0.00003800 |
| H  | 8.62716400  | -1.87132200 | 1.05784200  |
| H  | 8.62713900  | 1.87137200  | -1.05792100 |
| H  | 9.87363200  | 0.00003100  | -0.00004300 |

Zero-point correction= 0.324385 (Hartree/Particle)  
 Thermal correction to Energy= 0.365200  
 Thermal correction to Enthalpy= 0.366144  
 Thermal correction to Gibbs Free Energy= 0.244787  
 Sum of electronic and zero-point Energies= -2795.517460  
 Sum of electronic and thermal Energies= -2795.476646  
 Sum of electronic and thermal Enthalpies= -2795.475701  
 Sum of electronic and thermal Free Energies= -2795.597058

#### Energies and cartesian coordinates of the DFT optimized ground-state structure of 3

|   |             |             |             |
|---|-------------|-------------|-------------|
| C | 0.20105000  | -2.83112600 | -1.65927100 |
| H | 0.97089600  | -2.23061700 | -2.13151100 |
| C | -0.14163000 | -4.07306400 | -2.16290300 |
| H | 0.37206500  | -4.45803500 | -3.03741400 |
| C | -1.14856600 | -4.78979100 | -1.52282400 |
| H | -1.44534100 | -5.77227200 | -1.87942800 |
| C | -1.75944400 | -4.23381500 | -0.40975700 |
| H | -2.52459500 | -4.77594100 | 0.13610700  |
| C | -1.37650400 | -2.96903000 | 0.05389300  |
| C | -2.04258800 | -2.39709500 | 1.24127600  |
| C | -3.44093300 | -2.44054200 | 1.32758400  |
| H | -4.02171600 | -2.84212200 | 0.50028000  |

|    |             |             |             |
|----|-------------|-------------|-------------|
| C  | -4.09083600 | -1.92873200 | 2.44578300  |
| H  | -5.17643100 | -1.94592500 | 2.49314600  |
| C  | -3.35116100 | -1.38712000 | 3.49718400  |
| H  | -3.85947600 | -0.98635400 | 4.36999700  |
| C  | -1.96044500 | -1.35676900 | 3.42367500  |
| H  | -1.37767300 | -0.93921300 | 4.23991200  |
| C  | -1.30569400 | -1.85595800 | 2.30102500  |
| H  | -0.22098500 | -1.84764700 | 2.26423600  |
| C  | 2.16263000  | -0.78805800 | -0.06558900 |
| C  | 3.01961100  | -0.54889300 | -1.13249800 |
| C  | 4.37357500  | -0.86372200 | -1.10718400 |
| C  | 4.91091000  | -1.44275500 | 0.03610200  |
| C  | 4.08798800  | -1.70121300 | 1.12562300  |
| C  | 2.73888100  | -1.37120900 | 1.05380700  |
| C  | -1.79654500 | 0.38701500  | -0.43166500 |
| C  | -2.47695600 | 1.11538500  | 0.53502000  |
| C  | -3.79959300 | 1.51575600  | 0.37992800  |
| C  | -4.47756800 | 1.19218600  | -0.78881600 |
| C  | -3.82524700 | 0.47694800  | -1.78566000 |
| C  | -2.50329400 | 0.09449500  | -1.59007100 |
| C  | 0.71571300  | 1.66715700  | 0.01352300  |
| C  | 1.19137300  | 2.15184900  | 1.22426500  |
| C  | 1.58160500  | 3.47627900  | 1.38409800  |
| C  | 1.50092800  | 4.34774300  | 0.30447800  |
| C  | 1.03001900  | 3.88833000  | -0.91934700 |
| C  | 0.64346400  | 2.55843700  | -1.04889800 |
| N  | -0.39980900 | -2.28591800 | -0.58539100 |
| F  | 2.54043500  | 0.00011700  | -2.26451000 |
| F  | 5.15564400  | -0.62225400 | -2.15944700 |
| F  | 6.20290300  | -1.75563500 | 0.08447400  |
| F  | 4.59791000  | -2.26548600 | 2.22044700  |
| F  | 1.99181400  | -1.65546700 | 2.13556600  |
| F  | -1.87029500 | 1.45564000  | 1.68170100  |
| F  | -4.42536100 | 2.20013000  | 1.33880700  |
| F  | -5.74563100 | 1.56387300  | -0.95240400 |
| F  | -4.47138500 | 0.16709800  | -2.91151100 |
| F  | -1.91391800 | -0.59504200 | -2.58554700 |
| F  | 1.28480000  | 1.34225600  | 2.28600500  |
| F  | 2.03133200  | 3.91546400  | 2.55893800  |
| F  | 1.87299100  | 5.61727600  | 0.44282500  |
| F  | 0.95088300  | 4.72256400  | -1.95498300 |
| F  | 0.18992300  | 2.15603300  | -2.24155300 |
| Au | 0.15935500  | -0.25032500 | -0.20637400 |

Zero-point correction= 0.324368 (Hartree/Particle)  
 Thermal correction to Energy= 0.365022  
 Thermal correction to Enthalpy= 0.365966  
 Thermal correction to Gibbs Free Energy= 0.247348  
 Sum of electronic and zero-point Energies= -2795.514455  
 Sum of electronic and thermal Energies= -2795.473801  
 Sum of electronic and thermal Enthalpies= -2795.472857  
 Sum of electronic and thermal Free Energies= -2795.591475

**Energies and cartesian coordinates of the DFT optimized ground-state structure of 4**

|   |             |             |             |
|---|-------------|-------------|-------------|
| C | 2.64986900  | 0.22533500  | 1.43974100  |
| C | 3.59643600  | -0.80791500 | 1.47055100  |
| H | 4.28762400  | -0.93216100 | 0.64012800  |
| C | 3.63117900  | -1.69187400 | 2.54419700  |
| H | 4.35459000  | -2.50299600 | 2.55058400  |
| C | 2.73575900  | -1.54224300 | 3.60381100  |
| H | 2.76349500  | -2.23510300 | 4.44047900  |
| C | 1.80034900  | -0.51098500 | 3.58150300  |
| H | 1.09659200  | -0.39139700 | 4.40051100  |
| C | 1.75211400  | 0.36873700  | 2.50234500  |
| H | 1.02604800  | 1.17492100  | 2.49453200  |
| C | -1.40207200 | 1.83602100  | -0.02417500 |
| C | -2.10681600 | 2.29287000  | -1.13076000 |
| C | -2.89831200 | 3.43543900  | -1.11331400 |
| C | -3.00428800 | 4.16568800  | 0.06408400  |
| C | -2.31558600 | 3.74465800  | 1.19473500  |
| C | -1.53358300 | 2.59624300  | 1.12914000  |
| C | 0.74818300  | -1.68569900 | -0.43600400 |
| C | 0.73870600  | -2.71722200 | 0.49272800  |
| C | 1.43768800  | -3.90413500 | 0.30224600  |
| C | 2.17103100  | -4.08462700 | -0.86395300 |

|    |             |             |             |
|----|-------------|-------------|-------------|
| C  | 2.19360600  | -3.07975900 | -1.82337900 |
| C  | 1.48115900  | -1.90839300 | -1.59345700 |
| C  | -1.98144600 | -0.95656200 | -0.05028100 |
| C  | -2.69835400 | -1.04793300 | 1.13533400  |
| C  | -3.88142400 | -1.77211400 | 1.22641700  |
| C  | -4.37272200 | -2.42454700 | 0.10203300  |
| C  | -3.67680100 | -2.34804900 | -1.09797400 |
| C  | -2.49373300 | -1.61911900 | -1.15815400 |
| F  | -2.02598600 | 1.62470000  | -2.29740400 |
| F  | -3.54910100 | 3.83812300  | -2.20515000 |
| F  | -3.75402600 | 5.26408700  | 0.10639900  |
| F  | -2.40741000 | 4.44626800  | 2.32494600  |
| F  | -0.88651200 | 2.24796800  | 2.25566800  |
| F  | 0.04941200  | -2.59504200 | 1.63676500  |
| F  | 1.41977800  | -4.86652600 | 1.22654900  |
| F  | 2.85000200  | -5.21343300 | -1.06020000 |
| F  | 2.89298600  | -3.25014400 | -2.94714300 |
| F  | 1.52887100  | -0.96693500 | -2.55415800 |
| F  | -2.26093300 | -0.43134100 | 2.23970500  |
| F  | -4.54680700 | -1.84446100 | 2.37882200  |
| F  | -5.50518900 | -3.11897100 | 0.17453400  |
| F  | -4.14494900 | -2.97315900 | -2.17742800 |
| F  | -1.85134400 | -1.57543500 | -2.33109200 |
| Au | -0.27287900 | 0.09450700  | -0.17476900 |
| C  | 2.61850600  | 1.16142500  | 0.29136800  |
| C  | 1.47169200  | 2.06190300  | -1.54206200 |
| C  | 3.76322800  | 1.96243900  | -0.01897300 |
| C  | 2.53745700  | 2.81409200  | -1.93831400 |
| H  | 0.54169800  | 2.06039000  | -2.09839600 |
| C  | 4.92187000  | 1.98179900  | 0.80075900  |
| C  | 3.72728100  | 2.79481600  | -1.17508100 |
| H  | 2.46182000  | 3.42907800  | -2.83013700 |
| C  | 6.00183600  | 2.76167700  | 0.45985900  |
| H  | 4.94586600  | 1.38683800  | 1.70743100  |
| C  | 4.85706000  | 3.57919200  | -1.50714800 |
| C  | 5.97494900  | 3.55690300  | -0.70734700 |
| H  | 6.88135500  | 2.77262300  | 1.09749900  |
| H  | 4.82184600  | 4.20259900  | -2.39697100 |
| H  | 6.83927100  | 4.16338300  | -0.96443600 |
| N  | 1.51274000  | 1.24373700  | -0.44781000 |

Zero-point correction= 0.371398 (Hartree/Particle)  
 Thermal correction to Energy= 0.414824  
 Thermal correction to Enthalpy= 0.415769  
 Thermal correction to Gibbs Free Energy= 0.290153  
 Sum of electronic and zero-point Energies= -2948.933933  
 Sum of electronic and thermal Energies= -2948.890507  
 Sum of electronic and thermal Enthalpies= -2948.889563  
 Sum of electronic and thermal Free Energies= -2949.015179

#### Energies and cartesian coordinates of the DFT optimized ground-state structure of 5

|   |             |             |             |
|---|-------------|-------------|-------------|
| C | 0.25769100  | -2.77329100 | -1.72775700 |
| H | 0.99091200  | -2.13569900 | -2.21004000 |
| C | -0.05631200 | -4.01762400 | -2.24385600 |
| H | 0.43950200  | -4.36732200 | -3.14306000 |
| C | -1.01094500 | -4.78461600 | -1.58094600 |
| H | -1.28382100 | -5.77089400 | -1.94594000 |
| C | -1.59217400 | -4.28037600 | -0.42895100 |
| H | -2.30352700 | -4.86682600 | 0.14255200  |
| C | -1.24365400 | -3.00668300 | 0.04234400  |
| C | 2.16441000  | -0.68271500 | -0.16458200 |
| C | 3.04912800  | -0.19669600 | -1.11959900 |
| C | 4.40886200  | -0.49013400 | -1.11043800 |
| C | 4.92015100  | -1.30459000 | -0.10742800 |
| C | 4.06718500  | -1.81653200 | 0.86304500  |
| C | 2.71443700  | -1.49910100 | 0.81431900  |
| C | -1.84785600 | 0.33681900  | -0.41127500 |
| C | -2.54796200 | 1.03757100  | 0.56213400  |
| C | -3.88922900 | 1.37921900  | 0.42417300  |
| C | -4.56824100 | 1.02516200  | -0.73482500 |
| C | -3.89759300 | 0.33867400  | -1.73960100 |
| C | -2.55808900 | 0.01489700  | -1.56019500 |
| C | 0.61574100  | 1.71726500  | 0.04166800  |
| C | 1.12120000  | 2.16170300  | 1.25586200  |
| C | 1.45169200  | 3.49455500  | 1.47115900  |

|    |             |             |             |
|----|-------------|-------------|-------------|
| C  | 1.27814500  | 4.41564000  | 0.44510000  |
| C  | 0.77569600  | 3.99667800  | -0.78082200 |
| C  | 0.45058300  | 2.65723300  | -0.96646300 |
| N  | -0.32640400 | -2.26855100 | -0.62615300 |
| F  | 2.60155100  | 0.58032600  | -2.12055600 |
| F  | 5.22142900  | -0.00752100 | -2.05072500 |
| F  | 6.21693600  | -1.60019700 | -0.08124800 |
| F  | 4.55233800  | -2.60718500 | 1.82094000  |
| F  | 1.93116400  | -2.03328200 | 1.76668900  |
| F  | -1.94422600 | 1.41284600  | 1.70038200  |
| F  | -4.53046400 | 2.03835800  | 1.39060400  |
| F  | -5.85298600 | 1.34183300  | -0.88237800 |
| F  | -4.54313100 | 0.00040100  | -2.85752400 |
| F  | -1.95251400 | -0.64624300 | -2.56577100 |
| F  | 1.29929400  | 1.30382000  | 2.26835100  |
| F  | 1.93120200  | 3.89463900  | 2.64841900  |
| F  | 1.59227000  | 5.69410600  | 0.63585300  |
| F  | 0.60965100  | 4.87861100  | -1.76552100 |
| F  | -0.03234100 | 2.29390000  | -2.15986600 |
| Au | 0.14307200  | -0.21428400 | -0.23559800 |
| C  | -1.89594400 | -2.49527100 | 1.24536300  |
| C  | -3.23927800 | -2.60885500 | 1.53488400  |
| S  | -1.05107600 | -1.70776800 | 2.53641400  |
| C  | -3.58562700 | -2.03410300 | 2.78222500  |
| H  | -3.95565000 | -3.05055100 | 0.84907100  |
| C  | -2.49697200 | -1.51091300 | 3.43057900  |
| H  | -4.59385100 | -2.00183100 | 3.18041800  |
| H  | -2.46599800 | -1.01753200 | 4.39412800  |

Zero-point correction= 0.290460 (Hartree/Particle)  
 Thermal correction to Energy= 0.330759  
 Thermal correction to Enthalpy= 0.331703  
 Thermal correction to Gibbs Free Energy= 0.213794  
 Sum of electronic and zero-point Energies= -3116.244773  
 Sum of electronic and thermal Energies= -3116.204474  
 Sum of electronic and thermal Enthalpies= -3116.203530  
 Sum of electronic and thermal Free Energies= -3116.321440

#### Energies and cartesian coordinates of the DFT optimized triplet-state structure of 1

|   |             |             |             |
|---|-------------|-------------|-------------|
| C | -0.10355200 | -2.58249900 | -1.97748200 |
| H | 0.97337400  | -2.46328100 | -2.07484800 |
| C | -0.81532300 | -3.32860100 | -2.93930500 |
| H | -0.26504100 | -3.86793900 | -3.70249200 |
| C | -2.23137200 | -3.20743500 | -2.97640600 |
| H | -2.79582600 | -3.58807600 | -3.82179300 |
| C | -2.85813400 | -2.57766000 | -1.94331300 |
| H | -3.93451800 | -2.46801200 | -1.93582600 |
| C | -2.08154100 | -2.12536500 | -0.79014400 |
| C | -2.57604400 | -2.06344200 | 0.52072600  |
| C | -3.97486500 | -2.04872700 | 0.86749900  |
| C | -4.43929800 | -1.97073100 | 2.15481200  |
| H | -5.50469600 | -1.93772900 | 2.35489800  |
| C | -3.50554800 | -1.91228300 | 3.19178800  |
| C | -2.12794300 | -1.92787300 | 2.94826400  |
| H | -1.43127500 | -1.88338500 | 3.77907900  |
| C | -1.68372800 | -1.99992900 | 1.65085700  |
| H | -0.61776000 | -2.04408900 | 1.47001100  |
| C | 2.15522000  | -1.13133900 | -0.18274800 |
| C | 3.15620400  | -0.90740700 | -1.12058000 |
| C | 4.40423500  | -1.51813600 | -1.05718000 |
| C | 4.67910600  | -2.39035000 | -0.01038600 |
| C | 3.70542200  | -2.64071500 | 0.94932300  |
| C | 2.47110300  | -2.00929000 | 0.84462500  |
| C | -1.42598400 | 0.92122300  | -0.51298800 |
| C | -2.07597900 | 1.50645700  | 0.56382400  |
| C | -3.27654200 | 2.19751300  | 0.42920900  |
| C | -3.85246000 | 2.32326900  | -0.82946500 |
| C | -3.22486800 | 1.75736400  | -1.93326900 |
| C | -2.02819100 | 1.07210100  | -1.75456400 |
| C | 1.26029800  | 1.54931200  | 0.22770500  |
| C | 1.72476400  | 1.72579000  | 1.52387600  |
| C | 2.36525600  | 2.89306900  | 1.92392200  |
| C | 2.55250000  | 3.91864800  | 1.00490100  |
| C | 2.09726900  | 3.76827300  | -0.29942200 |
| C | 1.45753400  | 2.59011500  | -0.66987800 |

|    |             |             |             |
|----|-------------|-------------|-------------|
| N  | -0.67553700 | -1.92550500 | -0.98899700 |
| F  | 2.93295200  | -0.07621800 | -2.15254300 |
| F  | 5.33307800  | -1.28128600 | -1.98312700 |
| F  | 5.86493400  | -2.98718800 | 0.06911200  |
| F  | 3.96347200  | -3.48137200 | 1.95102400  |
| F  | 1.56467300  | -2.29245900 | 1.79894000  |
| F  | -1.56116000 | 1.41177400  | 1.80014400  |
| F  | -3.87996600 | 2.73635300  | 1.48924700  |
| F  | -5.00040600 | 2.97999400  | -0.97686800 |
| F  | -3.77711200 | 1.87355400  | -3.14150400 |
| F  | -1.46169500 | 0.52995600  | -2.84705100 |
| F  | 1.56520600  | 0.75906700  | 2.43690000  |
| F  | 2.80045500  | 3.03565300  | 3.17515600  |
| F  | 3.16495300  | 5.04055300  | 1.37284100  |
| F  | 2.27425400  | 4.75147900  | -1.18063500 |
| F  | 1.02768400  | 2.48635100  | -1.93248700 |
| Au | 0.33094000  | -0.15002300 | -0.32813100 |
| F  | -4.89726800 | -2.06347200 | -0.10855600 |
| F  | -3.95016200 | -1.83443700 | 4.44619800  |

|                                              |                             |
|----------------------------------------------|-----------------------------|
| Zero-point correction=                       | 0.303257 (Hartree/Particle) |
| Thermal correction to Energy=                | 0.346436                    |
| Thermal correction to Enthalpy=              | 0.347380                    |
| Thermal correction to Gibbs Free Energy=     | 0.220610                    |
| Sum of electronic and zero-point Energies=   | -2993.726005                |
| Sum of electronic and thermal Energies=      | -2993.682825                |
| Sum of electronic and thermal Enthalpies=    | -2993.681881                |
| Sum of electronic and thermal Free Energies= | -2993.808651                |

#### Energies and cartesian coordinates of the DFT optimized triplet-state structure of 2

|    |             |             |             |
|----|-------------|-------------|-------------|
| C  | 0.41214000  | 2.06808100  | 0.04974100  |
| C  | 0.85564400  | 2.79157600  | 1.14702100  |
| C  | 0.84908100  | 4.18231900  | 1.18118200  |
| C  | 0.38378900  | 4.88562500  | 0.07646200  |
| C  | -0.07131500 | 4.19441400  | -1.04069200 |
| C  | -0.04975200 | 2.80468900  | -1.03180400 |
| C  | 0.41194200  | -2.06808400 | -0.04954500 |
| C  | 0.85815600  | -2.79160900 | -1.14569900 |
| C  | 0.85145700  | -4.18234900 | -1.17992800 |
| C  | 0.38317100  | -4.88561600 | -0.07644800 |
| C  | -0.07474400 | -4.19436800 | 1.03953500  |
| C  | -0.05291200 | -2.80464600 | 1.03076100  |
| C  | 2.41585400  | -0.00011800 | 0.00028600  |
| C  | 3.13819000  | 0.44553300  | -1.09868900 |
| C  | 4.52861300  | 0.45006200  | -1.11413400 |
| C  | 5.22565600  | -0.00025100 | 0.00050300  |
| C  | 4.52839700  | -0.45050200 | 1.11503100  |
| C  | 3.13797700  | -0.44584300 | 1.09937300  |
| F  | 1.30425700  | 2.15113900  | 2.23977600  |
| F  | 1.27689800  | 4.84589500  | 2.25611700  |
| F  | 0.36708500  | 6.21662700  | 0.09042800  |
| F  | -0.52554200 | 4.86984400  | -2.09744800 |
| F  | -0.50956500 | 2.17341000  | -2.12674200 |
| F  | 1.30973800  | -2.15118500 | -2.23724300 |
| F  | 1.28196200  | -4.84595600 | -2.25377100 |
| F  | 0.36626500  | -6.21661500 | -0.09051400 |
| F  | -0.53188900 | -4.86976000 | 2.09505500  |
| F  | -0.51560800 | -2.17332300 | 2.12445600  |
| F  | 2.50233700  | 0.89024400  | -2.18948800 |
| F  | 5.19607600  | 0.88242900  | -2.18348700 |
| F  | 6.55630400  | -0.00031500 | 0.00060600  |
| F  | 5.19565500  | -0.88292600 | 2.18448800  |
| F  | 2.50192300  | -0.89048500 | 2.19007900  |
| Au | 0.40500100  | -0.00000500 | 0.00010000  |
| C  | -2.38849700 | -0.46000800 | -1.07470800 |
| C  | -2.38871700 | 0.46018500  | 1.07425600  |
| C  | -3.75470100 | -0.47423000 | -1.11841800 |
| C  | -3.75493100 | 0.47450000  | 1.11764700  |
| H  | -1.79487700 | 0.81726300  | 1.90896900  |
| C  | -4.54097500 | 0.00016500  | -0.00047900 |
| H  | -4.22363100 | 0.85343100  | 2.01721300  |
| N  | -1.69198300 | 0.00007100  | -0.00014700 |
| H  | -1.79448800 | -0.81712500 | -1.90928400 |
| H  | -4.22321600 | -0.85312900 | -2.01809400 |
| C  | -5.93641500 | 0.00021600  | -0.00064600 |

|   |             |             |             |
|---|-------------|-------------|-------------|
| C | -6.71723900 | 0.48389900  | 1.14523900  |
| C | -6.71699700 | -0.48341000 | -1.14672000 |
| C | -8.07936700 | 0.47746300  | 1.12987600  |
| H | -6.20298700 | 0.85381600  | 2.02387300  |
| C | -8.07912900 | -0.47687200 | -1.13168700 |
| H | -6.20255900 | -0.85336100 | -2.02523000 |
| C | -8.79991600 | 0.00032100  | -0.00099300 |
| H | -8.62732400 | 0.84207400  | 1.99454400  |
| H | -8.62690200 | -0.84144100 | -1.99648900 |
| H | -9.88500700 | 0.00036200  | -0.00112400 |

Zero-point correction= 0.319348 (Hartree/Particle)  
 Thermal correction to Energy= 0.361021  
 Thermal correction to Enthalpy= 0.361965  
 Thermal correction to Gibbs Free Energy= 0.236186  
 Sum of electronic and zero-point Energies= -2795.413316  
 Sum of electronic and thermal Energies= -2795.371643  
 Sum of electronic and thermal Enthalpies= -2795.370698  
 Sum of electronic and thermal Free Energies= -2795.496478

### Energies and cartesian coordinates of the DFT optimized triplet-state structure of 3

|   |             |             |             |
|---|-------------|-------------|-------------|
| C | -0.08627400 | -2.80389000 | -1.66028000 |
| H | 0.95152200  | -2.55347400 | -1.86847600 |
| C | -0.76492900 | -3.71653400 | -2.49579900 |
| H | -0.21068800 | -4.23698800 | -3.26907400 |
| C | -2.17982800 | -3.78797700 | -2.40835400 |
| H | -2.75509400 | -4.30589600 | -3.16954500 |
| C | -2.79391100 | -3.16174700 | -1.36447900 |
| H | -3.87462100 | -3.18021000 | -1.27734100 |
| C | -1.99558300 | -2.51667400 | -0.32644600 |
| C | -2.43621900 | -2.39820400 | 0.99460800  |
| C | -3.80813700 | -2.67169300 | 1.36037600  |
| H | -4.52118000 | -2.98225100 | 0.60546900  |
| C | -4.24162900 | -2.51423100 | 2.65485000  |
| H | -5.28361300 | -2.70613500 | 2.89640300  |
| C | -3.35454000 | -2.10203800 | 3.66832900  |
| H | -3.70885700 | -1.97349300 | 4.68667100  |
| C | -2.00442400 | -1.86005200 | 3.34880300  |
| H | -1.31006800 | -1.55613700 | 4.12727400  |
| C | -1.54867200 | -2.00396500 | 2.06082600  |
| H | -0.49887200 | -1.84345900 | 1.84926500  |
| C | 2.10072200  | -0.98277100 | -0.14018900 |
| C | 3.01107700  | -0.73870400 | -1.16124500 |
| C | 4.32019700  | -1.20795900 | -1.13705200 |
| C | 4.75293200  | -1.95087000 | -0.04502900 |
| C | 3.87358300  | -2.21593400 | 0.99822000  |
| C | 2.57293400  | -1.72885000 | 0.93085800  |
| C | -1.70739000 | 0.62885000  | -0.36402600 |
| C | -2.33117600 | 1.26160400  | 0.70174300  |
| C | -3.61051400 | 1.80122200  | 0.60862000  |
| C | -4.29760700 | 1.71996700  | -0.59638100 |
| C | -3.70022600 | 1.10226000  | -1.68905400 |
| C | -2.42171300 | 0.57374600  | -1.55280600 |
| C | 0.93524500  | 1.61249300  | 0.10150900  |
| C | 1.46709400  | 1.96173800  | 1.33524000  |
| C | 1.99598000  | 3.22424800  | 1.57835900  |
| C | 1.99901800  | 4.17104500  | 0.56106800  |
| C | 1.47301900  | 3.84794600  | -0.68384900 |
| C | 0.94829300  | 2.57755900  | -0.89665200 |
| N | -0.65750000 | -2.14937100 | -0.67016200 |
| F | 2.63461100  | -0.03003200 | -2.23955400 |
| F | 5.15892300  | -0.95803400 | -2.14269400 |
| F | 6.00018400  | -2.41141300 | -0.00126800 |
| F | 4.28473900  | -2.93303700 | 2.04413400  |
| F | 1.76380900  | -2.01822500 | 1.96546800  |
| F | -1.70988000 | 1.36740800  | 1.88642300  |
| F | -4.18412300 | 2.39134700  | 1.65810300  |
| F | -5.52294300 | 2.22950500  | -0.70396500 |
| F | -4.35944600 | 1.02036900  | -2.84647500 |
| F | -1.88679100 | -0.02460600 | -2.63259300 |
| F | 1.48441400  | 1.07606100  | 2.33949900  |
| F | 2.49926300  | 3.53261300  | 2.77318000  |
| F | 2.50325600  | 5.38275600  | 0.77870800  |
| F | 1.47356600  | 4.75542700  | -1.65938900 |
| F | 0.44556900  | 2.30744300  | -2.10681600 |

Au 0.17143900 -0.22187500 -0.23031600

Zero-point correction= 0.319539 (Hartree/Particle)  
Thermal correction to Energy= 0.360974  
Thermal correction to Enthalpy= 0.361918  
Thermal correction to Gibbs Free Energy= 0.239677  
Sum of electronic and zero-point Energies= -2795.409273  
Sum of electronic and thermal Energies= -2795.367838  
Sum of electronic and thermal Enthalpies= -2795.366894  
Sum of electronic and thermal Free Energies= -2795.489135

**Energies and cartesian coordinates of the DFT optimized triplet-state structure of 4**

|    |             |             |             |
|----|-------------|-------------|-------------|
| C  | 2.64213100  | 0.36449600  | 1.50983200  |
| C  | 3.70947200  | -0.54278900 | 1.67489500  |
| H  | 4.48692400  | -0.59505600 | 0.91680900  |
| C  | 3.74248200  | -1.40950500 | 2.75952900  |
| H  | 4.55919900  | -2.12040700 | 2.85527900  |
| C  | 2.72079600  | -1.38422500 | 3.71126500  |
| H  | 2.74565500  | -2.06647100 | 4.55658900  |
| C  | 1.65998500  | -0.49057000 | 3.56206400  |
| H  | 0.85901700  | -0.46478600 | 4.29583400  |
| C  | 1.61378400  | 0.36906500  | 2.47157400  |
| H  | 0.79492900  | 1.07545900  | 2.38353400  |
| C  | -1.57197600 | 1.76563900  | 0.01833900  |
| C  | -2.27576600 | 2.20601700  | -1.09519300 |
| C  | -3.14456300 | 3.29107500  | -1.06852800 |
| C  | -3.33226100 | 3.97585200  | 0.12583900  |
| C  | -2.64685300 | 3.56905300  | 1.26415300  |
| C  | -1.78561700 | 2.47947400  | 1.18918300  |
| C  | 0.84964200  | -1.57313600 | -0.41086400 |
| C  | 0.88908200  | -2.62252600 | 0.49739300  |
| C  | 1.69382000  | -3.74233400 | 0.31626000  |
| C  | 2.48712600  | -3.83587400 | -0.82026400 |
| C  | 2.46197700  | -2.81329900 | -1.76054200 |
| C  | 1.64396400  | -1.71111400 | -1.54084600 |
| C  | -1.94164700 | -1.06271800 | -0.11425600 |
| C  | -2.68877100 | -1.24629600 | 1.04133800  |
| C  | -3.81658800 | -2.05848200 | 1.06792100  |
| C  | -4.21870400 | -2.70844000 | -0.09276200 |
| C  | -3.48998300 | -2.54182700 | -1.26388200 |
| C  | -2.36388100 | -1.72534900 | -1.25936700 |
| F  | -2.11682300 | 1.57918200  | -2.27730900 |
| F  | -3.79193400 | 3.68158200  | -2.16696500 |
| F  | -4.15653100 | 5.01902600  | 0.17755700  |
| F  | -2.81784600 | 4.22921800  | 2.40975800  |
| F  | -1.14522100 | 2.14126700  | 2.32214900  |
| F  | 0.14151100  | -2.58725600 | 1.61033700  |
| F  | 1.71752500  | -4.72289000 | 1.22084200  |
| F  | 3.26712900  | -4.89903600 | -1.00759500 |
| F  | 3.21807900  | -2.90080600 | -2.85694100 |
| F  | 1.65042500  | -0.75121800 | -2.48569800 |
| F  | -2.33437300 | -0.63657000 | 2.17882900  |
| F  | -4.51330000 | -2.21791100 | 2.19272000  |
| F  | -5.29748800 | -3.48704000 | -0.08237000 |
| F  | -3.87283400 | -3.16506600 | -2.37764400 |
| F  | -1.68598100 | -1.59660000 | -2.40606600 |
| Au | -0.31469500 | 0.11745400  | -0.14374200 |
| C  | 2.61154200  | 1.27267200  | 0.37225800  |
| C  | 1.35426800  | 2.15117600  | -1.41601000 |
| C  | 3.75149500  | 2.04986100  | -0.01812100 |
| C  | 2.46617100  | 2.87461500  | -1.91508900 |
| H  | 0.41205900  | 2.19300400  | -1.95560900 |
| C  | 4.92110900  | 2.13635100  | 0.74576900  |
| C  | 3.69321400  | 2.83603200  | -1.22059900 |
| H  | 2.34408300  | 3.47383800  | -2.81153000 |
| C  | 6.05209400  | 2.88112500  | 0.29528200  |
| H  | 4.97138400  | 1.64607500  | 1.71206300  |
| C  | 4.81070000  | 3.57005200  | -1.63959500 |
| C  | 6.01067800  | 3.58100300  | -0.88295300 |
| H  | 6.94873800  | 2.88701500  | 0.90907700  |
| H  | 4.74360500  | 4.14399400  | -2.56067200 |
| H  | 6.86887200  | 4.14607900  | -1.23272400 |
| N  | 1.38740400  | 1.39985800  | -0.34309100 |

Zero-point correction= 0.367062 (Hartree/Particle)

|                                              |              |
|----------------------------------------------|--------------|
| Thermal correction to Energy=                | 0.411020     |
| Thermal correction to Enthalpy=              | 0.411965     |
| Thermal correction to Gibbs Free Energy=     | 0.283416     |
| Sum of electronic and zero-point Energies=   | -2948.844544 |
| Sum of electronic and thermal Energies=      | -2948.800586 |
| Sum of electronic and thermal Enthalpies=    | -2948.799642 |
| Sum of electronic and thermal Free Energies= | -2948.928190 |

**Energies and cartesian coordinates of the DFT optimized triplet-state structure of 5**

|    |             |             |             |
|----|-------------|-------------|-------------|
| C  | -0.01497100 | -2.75236100 | -1.71640300 |
| H  | 0.93410700  | -2.32835900 | -2.03092500 |
| C  | -0.62801600 | -3.73863300 | -2.48747400 |
| H  | -0.12624900 | -4.11106600 | -3.37360700 |
| C  | -1.91855500 | -4.16808800 | -2.12499100 |
| H  | -2.46156200 | -4.87758100 | -2.74208600 |
| C  | -2.47836900 | -3.67691700 | -0.97262800 |
| H  | -3.45759000 | -4.01624300 | -0.65533400 |
| C  | -1.75131700 | -2.76522000 | -0.13680700 |
| C  | 2.11900200  | -0.86605800 | -0.14066600 |
| C  | 2.97840100  | -0.57206200 | -1.19220600 |
| C  | 4.31434900  | -0.95810600 | -1.21110700 |
| C  | 4.82821600  | -1.66763400 | -0.13258100 |
| C  | 4.00139100  | -1.98194700 | 0.93923000  |
| C  | 2.67044800  | -1.57849200 | 0.91591500  |
| C  | -1.79200000 | 0.49919400  | -0.33430400 |
| C  | -2.42332900 | 1.21663000  | 0.67386500  |
| C  | -3.72388400 | 1.69701000  | 0.55533000  |
| C  | -4.42993000 | 1.47232800  | -0.61962300 |
| C  | -3.82754300 | 0.77219100  | -1.65789600 |
| C  | -2.52783400 | 0.30687100  | -1.49671800 |
| C  | 0.79474000  | 1.64943600  | 0.05622000  |
| C  | 1.33147500  | 2.07349000  | 1.26424600  |
| C  | 1.78512600  | 3.37411000  | 1.45154600  |
| C  | 1.70594400  | 4.28321100  | 0.40342000  |
| C  | 1.17350600  | 3.88479900  | -0.81657000 |
| C  | 0.72464100  | 2.57771900  | -0.97395800 |
| N  | -0.54137700 | -2.23765000 | -0.60598500 |
| F  | 2.52285500  | 0.10370800  | -2.26230800 |
| F  | 5.10121000  | -0.66149000 | -2.24606700 |
| F  | 6.10275800  | -2.04973900 | -0.12891700 |
| F  | 4.49079800  | -2.66882200 | 1.97212600  |
| F  | 1.91706900  | -1.91566300 | 1.97324700  |
| F  | -1.79049000 | 1.47349000  | 1.82953100  |
| F  | -4.29957300 | 2.36778900  | 1.55501800  |
| F  | -5.67564600 | 1.92350400  | -0.74987200 |
| F  | -4.50091900 | 0.55395600  | -2.78902100 |
| F  | -1.98995000 | -0.36396400 | -2.53144200 |
| F  | 1.42437900  | 1.22716600  | 2.29723900  |
| F  | 2.29358600  | 3.75497000  | 2.62315000  |
| F  | 2.13781500  | 5.53077900  | 0.56803400  |
| F  | 1.09524200  | 4.75576800  | -1.82187300 |
| F  | 0.21293600  | 2.23562100  | -2.16182100 |
| Au | 0.14198500  | -0.23739100 | -0.19197400 |
| C  | -2.18602000 | -2.49982700 | 1.15544300  |
| C  | -3.50431900 | -2.82113300 | 1.72316500  |
| S  | -1.17732900 | -1.72670000 | 2.37487200  |
| C  | -3.65281700 | -2.36627300 | 3.00669300  |
| H  | -4.28600200 | -3.30875700 | 1.15488000  |
| C  | -2.50540800 | -1.72699500 | 3.51065900  |
| H  | -4.56485500 | -2.46591400 | 3.58578200  |
| H  | -2.38394300 | -1.25451600 | 4.47717100  |

|                                              |                             |
|----------------------------------------------|-----------------------------|
| Zero-point correction=                       | 0.286101 (Hartree/Particle) |
| Thermal correction to Energy=                | 0.327206                    |
| Thermal correction to Enthalpy=              | 0.328150                    |
| Thermal correction to Gibbs Free Energy=     | 0.206401                    |
| Sum of electronic and zero-point Energies=   | -3116.156417                |
| Sum of electronic and thermal Energies=      | -3116.115312                |
| Sum of electronic and thermal Enthalpies=    | -3116.114367                |
| Sum of electronic and thermal Free Energies= | -3116.236117                |



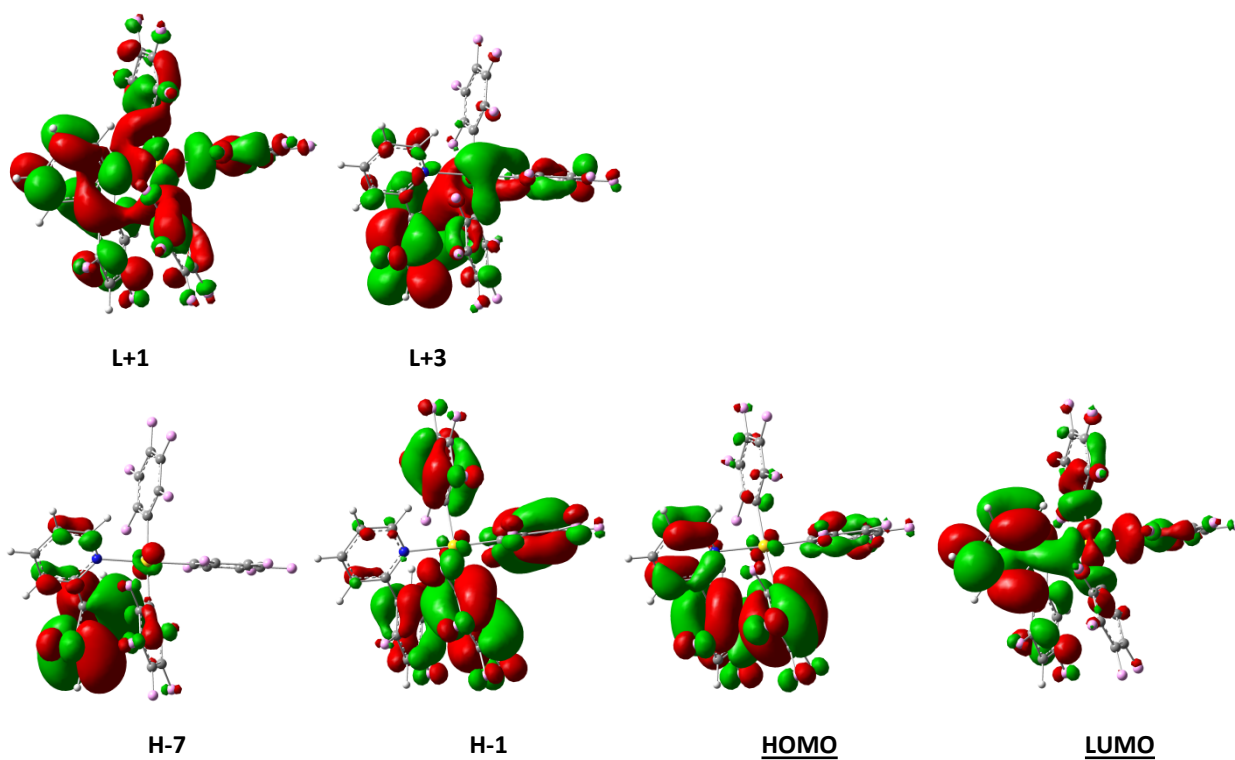

Figure S7. Spatial plots of selected frontier orbitals of the optimized ground state of 1.

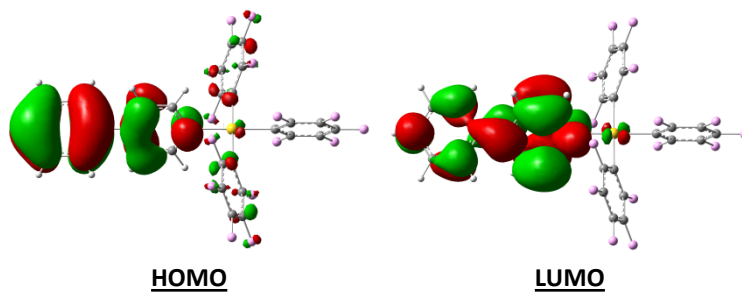

Figure S8. Spatial plots of selected frontier orbitals of the optimized ground state of 2.

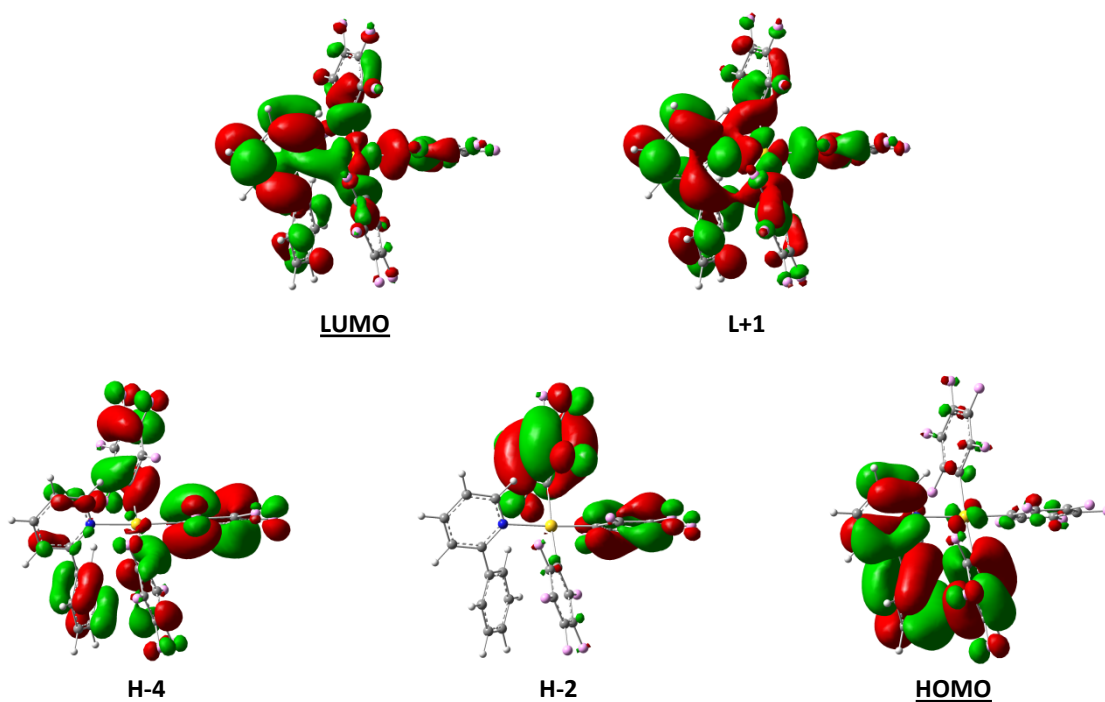

Figure S9. Spatial plots of selected frontier orbitals of the optimized ground state of **3**.

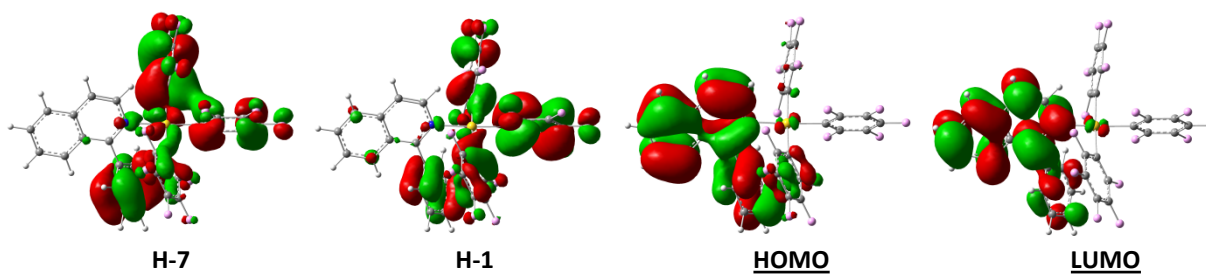

Figure S10. Spatial plots of selected frontier orbitals of the optimized ground state of **4**.

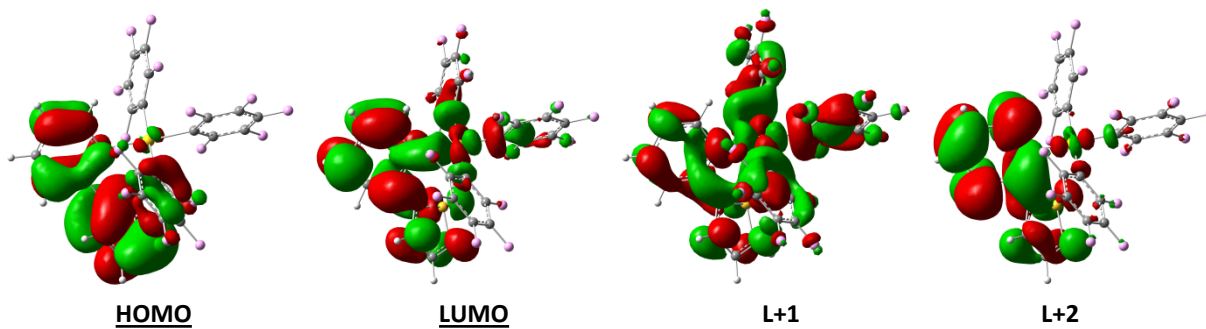

Figure S11. Spatial plots of selected frontier orbitals of the optimized ground state of **5**.

Table S21. Energy levels of a selection of frontier orbitals of the DFT optimized ground state  $S_0$  and triplet state  $T_1$  structures of **1** – **5**.

| MO                           |                   |    | 1     | 2     | 3     | 4     | 5     |
|------------------------------|-------------------|----|-------|-------|-------|-------|-------|
| ground-state                 | LUMO              | eV | -2.14 | -2.20 | -2.05 | -2.30 | -2.13 |
|                              | HOMO              | eV | -7.31 | -7.39 | -7.24 | -7.02 | -6.92 |
|                              | $\Delta E(H-L)$   | eV | 5.17  | 5.19  | 5.19  | 4.72  | 4.79  |
|                              |                   | nm | 240   | 239   | 239   | 263   | 259   |
| exp. abs., $\lambda_{max}^a$ |                   | nm | 277   | 279   | 281   | 335   | 317   |
| triplet-state                | SOMO <sup>b</sup> | eV | -2.67 | -2.63 | -2.60 | -2.48 | -2.51 |
|                              | SOMO-1            | eV | -4.61 | -4.81 | -4.51 | -4.42 | -4.39 |

<sup>a</sup>recorded at room temperature in  $CH_2Cl_2$  <sup>b</sup>restricted open-shell single point calculations on the optimized triplet state geometries.

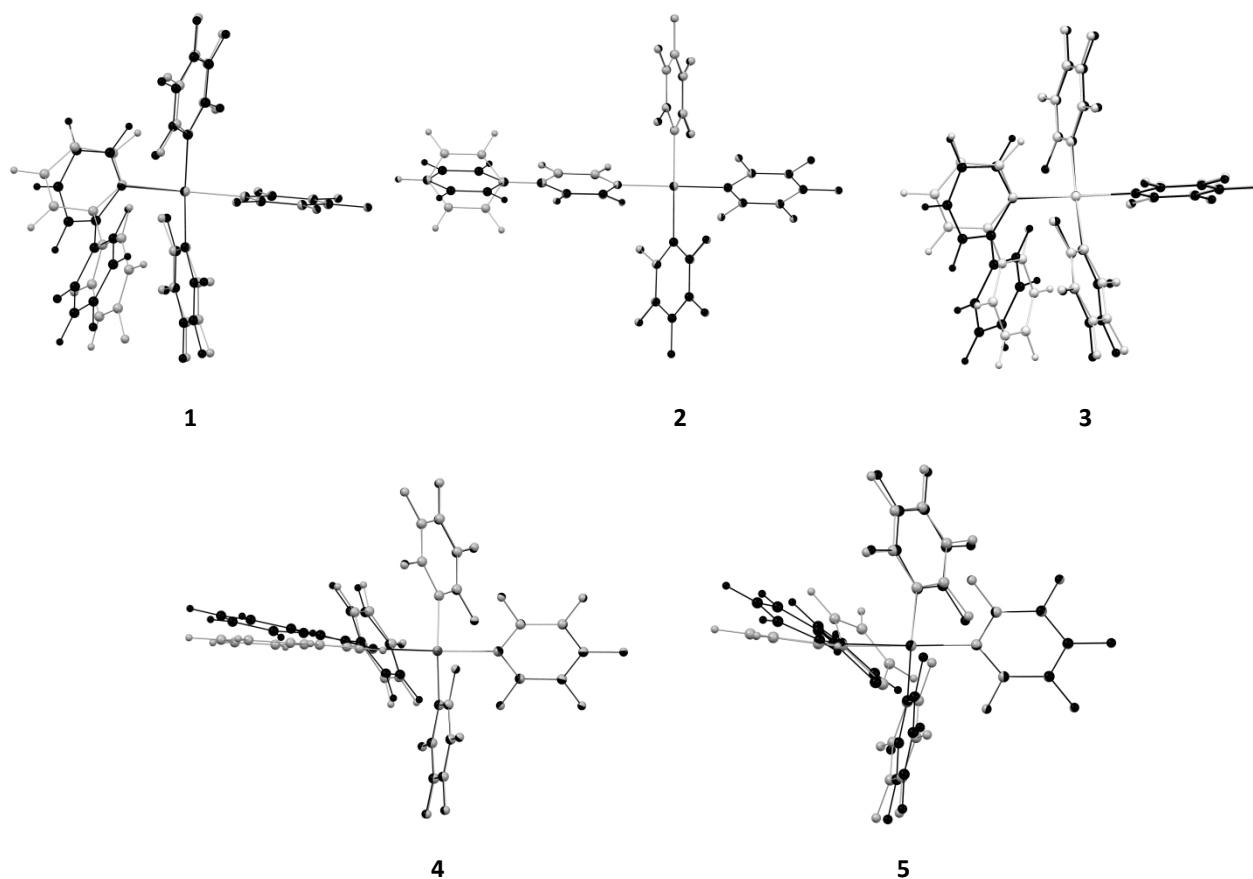

Figure S12. Overlay plots of the DFT optimized ground state (light grey) and triplet state (black) structures of **1** – **5**.
